# Supplementary material for: A supramolecular ensemble of a PBI derivative and Cu2O NPs: potential photocatalysts for the Suzuki and Suzuki type coupling reactions
Source: Royal Society of Chemistry journal article supplement (doi:10.1039/c5gc03012a), 2016-01-01
Supplement: c5gc03012a1.pdf [file c5gc03012a1.pdf]

**Supramolecular ensemble of PBI derivative and Cu<sub>2</sub>O NPs: Potential photo catalysts for Suzuki and Suzuki type coupling reactions**

Gurpreet Singh, Manoj Kumar, Kamaldeep Sharma and Vandana Bhalla\*

Department of Chemistry, UGC-Centre for Advanced Studies-II, Guru Nanak Dev University,  
Amritsar, Punjab, India.

*Email* : [vanmanan@yahoo.co.in](mailto:vanmanan@yahoo.co.in)

**Contents**

**S3-S4** Comparison tables

**S5** Synthetic scheme and synthesis of compound **2**.

**S6** TEM image of derivative **1** and fluorescence spectra of derivative **1** upon addition of Benedict's solution.

**S7** XRD spectrum of Cu<sub>2</sub>O NPs and TEM images of spherical supramolecular ensemble **2**:Cu<sub>2</sub>O at different conc. of derivative **1**.

**S8** Overlay NMR spectra of derivative **1** and oxidized of derivative **1** and FTIR absorption spectra of Cu<sub>2</sub>O NPs.

**S9** Fluorescence spectra of oxidized species **2** (10 μM) upon addition Cu<sub>2</sub>O NPs.

**S10** Exponential fluorescence decays and fluorescence lifetime data of oxidized species of **2** on addition of various amounts of bare Cu<sub>2</sub>O NPs.

**S11** Spectral overlap of absorption spectrum of Cu<sub>2</sub>O NPs and emission spectrum of oxidized species of **1** and UV-vis spectra of oxidized species **2** (10 μM) upon addition Benedict's solution.

**S12** Catalytic efficiency of supramolecular ensemble **2**:Cu<sub>2</sub>O for photocatalytic Suzuki coupling reaction of bromobenzene with phenyl boronic acid and TEM image of spherical supramolecular ensemble **2**:Cu<sub>2</sub>O; recovered after photocatalytic Suzuki coupling.

- S13** Atomic absorption Studies (AAS) of the residual liquid left after the after the recycling of the catalyst.
- S14**  $^1\text{H}$  NMR of compound **5**.
- S15**  $^1\text{H}$  NMR of compound **7a**.
- S16**  $^1\text{H}$  NMR of compound **7b**.
- S17**  $^1\text{H}$  NMR of compound **7c**.
- S18**  $^1\text{H}$  NMR of compound **7d**.
- S19**  $^1\text{H}$  NMR of compound **7e**.
- S20**  $^1\text{H}$  NMR of compound **7f**.
- S21**  $^1\text{H}$  NMR of compound **9d**.
- S22**  $^1\text{H}$  NMR of compound **11c**.
- S23**  $^1\text{H}$  NMR of compound **1**.
- S24**  $^1\text{H}$  NMR of compound **12**.
- S25**  $^1\text{H}$  NMR of compound **13**.
- S26**  $^1\text{H}$  NMR of compound **15a**.
- S27**  $^1\text{H}$  NMR of compound **15b**.
- S28**  $^1\text{H}$  NMR of compound **15c**.
- S29**  $^1\text{H}$  NMR of compound **15d**.
- S30**  $^1\text{H}$  NMR of compound **2**.
- S31** Mass spectrum of compound **2**.

**Table S1:** Comparison of method for the preparation of supramolecular ensemble 2: Cu<sub>2</sub>O in this manuscript with other reported methods in the literature for the preparation of Cu<sub>2</sub>O NPs.

| Entry | Method of preparation of NPs | NPs                                         | Reducing agent | Special additive or surfactant | Temp. (° C) | Time       | Shape of NPs                | Recyclability /Reusability | Application of NPs             | Journals                                      |
|-------|------------------------------|---------------------------------------------|----------------|--------------------------------|-------------|------------|-----------------------------|----------------------------|--------------------------------|-----------------------------------------------|
| 1     | Wet chemical method          | Supramolecular ensemble 2:Cu <sub>2</sub> O | NO             | NO                             | Room temp.  | 8 h        | Spherical                   | Yes                        | Photocatalytic Suzuki coupling | Present manuscript                            |
| 2     | Chemical method              | Cu <sub>2</sub> O NPs                       | Yes            | Yes                            | 15          | 30 min     | Rod                         | No                         | NH <sub>3</sub> gas sensing.   | J. Mater. Chem. A, 2015, 3, 1174–1181         |
| 3     | Chemical method              | Cu <sub>2</sub> O NPs                       | Yes            | Yes                            | 80-90       | 2-3 h      | Spherical                   | No                         | antibacterial activity         | RSC Adv., 2015, 5, 12293–12299   12293        |
| 4     | Chemical method              | Cu <sub>2</sub> O NPs                       | Yes            | Yes                            | 80          | 12 h       | Cube                        | No                         | -                              | CrystEngComm, 2011, 13, 6265–6270             |
| 5     | Chemical method              | Cu <sub>2</sub> O NPs                       | Yes            | Yes                            | 30-50       | 30–90 min, | Cube                        | No                         | -                              | CrystEngComm, 2011, 13, 4060–4068             |
| 6     | Chemical method              | Cu <sub>2</sub> O NPs                       | Yes            | Yes                            | 80          | 10 h       | Cube, octahedron and sphere | No                         | -                              | Crystal Growth & Design, Vol. 10, No. 1, 2010 |
| 7     | Chemical method              | Cu <sub>2</sub> O NPs                       | Yes            | Yes                            | 150         | 18 h       | Octahedron Microcrystals    | No                         | Photocatalytic                 | Crystal Growth & Design, Vol. 10, No. 5, 2010 |
| 8     | Chemical method              | Cu <sub>2</sub> O NPs                       | Yes            | Yes                            | 140         | 1 h        | Spherical and cube          | No                         | -                              | J. Mater. Chem., 2008, 18, 4069-4073          |
| 9     | Chemical method              | Cu <sub>2</sub> O NPs                       | Yes            | Yes                            | Room temp   | 30 min     | Cube                        | No                         | -                              | J. Mater. Chem., 2004, 14, 735–738            |
| 10    | Chemical method              | Cu <sub>2</sub> O NPs                       | Yes            | No                             | 60-80       | 4 h        | octahedral to microrod      | No                         | -                              | CrystEngComm, 2012, 14, 8338–8341             |

**Table S2:** Comparison of catalytic efficiency of supramolecular ensemble 2: Cu<sub>2</sub>O for the photocatalytic Suzuki-coupling reactions with other reported photocatalysts in literature.

| Entry | Source of light              | Photo catalyst                              | Amount of catalyst        | Reaction conditions                                                               | Reaction temp | Time   | TOF (h <sup>-1</sup> ) | Recyclability / Reusability | Journals                                              |
|-------|------------------------------|---------------------------------------------|---------------------------|-----------------------------------------------------------------------------------|---------------|--------|------------------------|-----------------------------|-------------------------------------------------------|
| 1     | 100 W tungsten filament bulb | Supramolecular ensemble 2:Cu <sub>2</sub> O | 0.02 mmol                 | H <sub>2</sub> O/EtOH (1:1), K <sub>2</sub> CO <sub>3</sub> (1.5 eq.)             | Room temp.    | 8 h    | 1.45 (bromobenzene)    | Yes                         | Present manuscript                                    |
| 2     | 300 W Xe lamp                | Pd/SiC                                      | 10 mg                     | DMF/H <sub>2</sub> O (3:1), Cs <sub>2</sub> CO <sub>3</sub> (3 eq.)               | 30 °C         | 1.33 h | 1053 (Iodobenzene)     | Yes                         | <i>J. Phys. Chem. C</i> 2015, <b>119</b> , 3238–3243  |
| 3     | Xe lamp (150W)               | Pd/Au/PN-CeO <sub>2</sub>                   | 15 mg                     | DMF/H <sub>2</sub> O (3:1), 0.6 mmol K <sub>2</sub> CO <sub>3</sub> ,             | Room temp.    | 1 h    | -                      | Yes                         | <i>ACS Catal.</i> 2015, <b>5</b> , 6481–6488          |
| 4     | 100 W tungsten filament bulb | Ag@Cu <sub>2</sub> O                        | 0.02 mmol                 | H <sub>2</sub> O/EtOH (3:1), K <sub>2</sub> CO <sub>3</sub> (1.5 eq.)             | Room temp.    | 5 h    | -                      | Yes                         | <i>Chem. Commun.</i> , 2015, <b>51</b> , 12529-12532  |
| 5     | White LED lamp               | Pd@B-BO <sub>3</sub>                        | 10 mg                     | DMF/H <sub>2</sub> O (1:1), K <sub>2</sub> CO <sub>3</sub> (1.5 eq.)              | Room temp.    | 2 h    | -                      | Yes                         | <i>Chem. mater.</i> 2015, <b>27</b> , 1921            |
| 6     | 500 W Xe lamp                | Ru–Pd bimetallic complex                    | 5 × 10 <sup>-4</sup> mmol | EtOH, PPh <sub>3</sub> , K <sub>2</sub> CO <sub>3</sub> , Ar-atmosphere           | Room temp.    | 6 h    | -                      | No                          | <i>Chem. Commun.</i> , 2014, <b>50</b> , 14501-14503  |
| 7     | Halogen lamp                 | Au–Pd alloy NP                              | 50 mg                     | DMF/H <sub>2</sub> O (3:1), K <sub>2</sub> CO <sub>3</sub> (3 eq.), Ar atmosphere | 30 °C         | 6 hr   | 14.5 (bromobenzene)    | Yes                         | <i>Green Chem.</i> , 2014, <b>16</b> , 4272–4285      |
| 8     | Sunlight                     | Au–Pd nanostructures                        | 0.49 μmol                 | NaOH, CTAB, H <sub>2</sub> O                                                      | Room temp.    | 2 h    | 162 (bromobenzene)     | Yes                         | <i>J. Am. Chem. Soc.</i> 2013, <b>135</b> , 5588–5601 |

**Scheme 1:** Synthetic scheme of compound **2**.

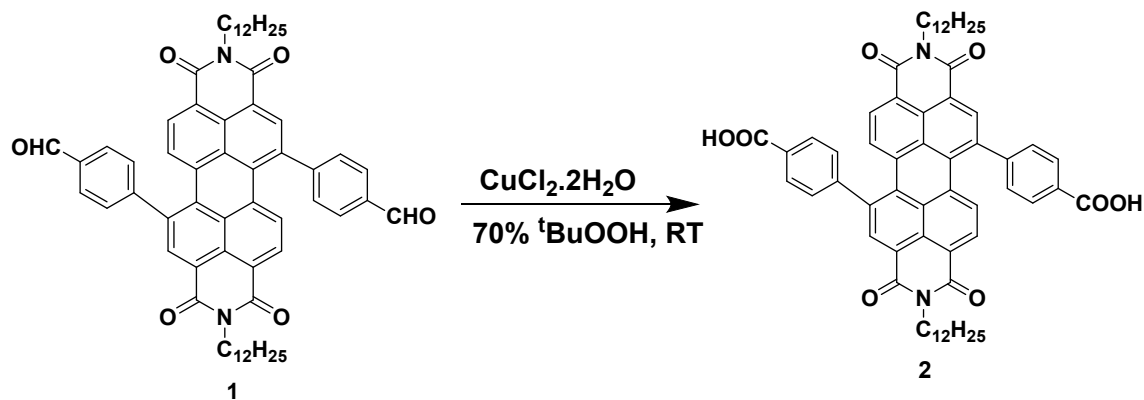

**Synthesis of compound 2.** To a solution of derivative **1** (50 mg, 0.05 mmol) and  $CuCl_2 \cdot 2H_2O$  (0.45 mg, 0.06 mmol) in acetonitrile/THF (3:1) mixture was slowly added aqueous  $tBuOOH$  (11.76  $\mu L$ , 0.05 mmol, 70% in water) over 24 h. The resulting reaction mixture was stirred at room temperature until the disappearance of starting material (TLC). After completion of the reaction, the solvent was evaporated and to the resulting crude reaction mixture water was added. The pH was adjusted to 8.0–8.5 with saturated sodium bicarbonate solution and then the reaction mixture was extracted with ethyl acetate. The aqueous layer was acidified to pH 2.0 using 2 N HCl and extracted with ethyl acetate. The organic layer was concentrated and purified by silica gel column chromatography to give the carboxylic acid.

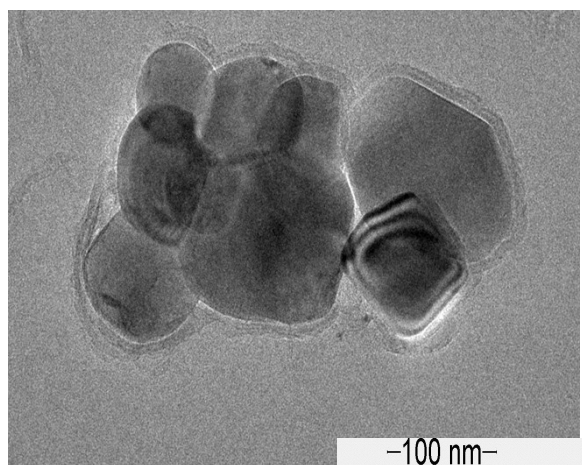

**Fig.S1:** TEM image of derivative **1** showing irregular shapes aggregates.

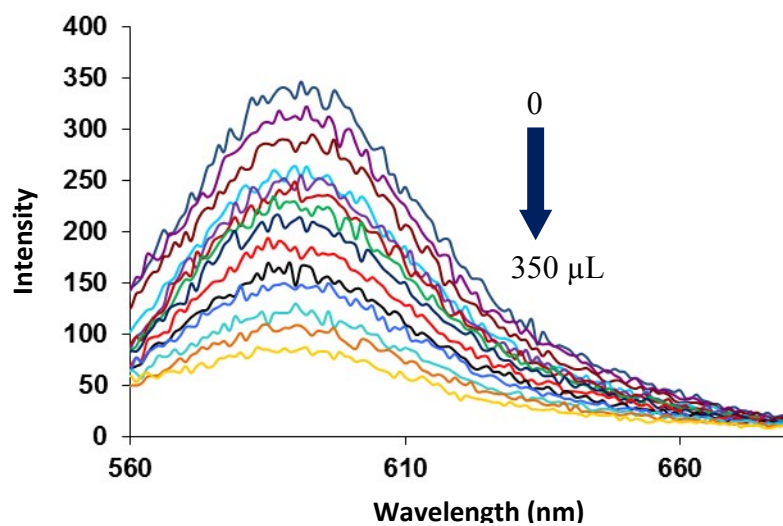

**Fig.S2:** Fluorescence spectra of derivative **1** (10 μM) upon addition of Benedict's solution (350 μL, 0.04 M).

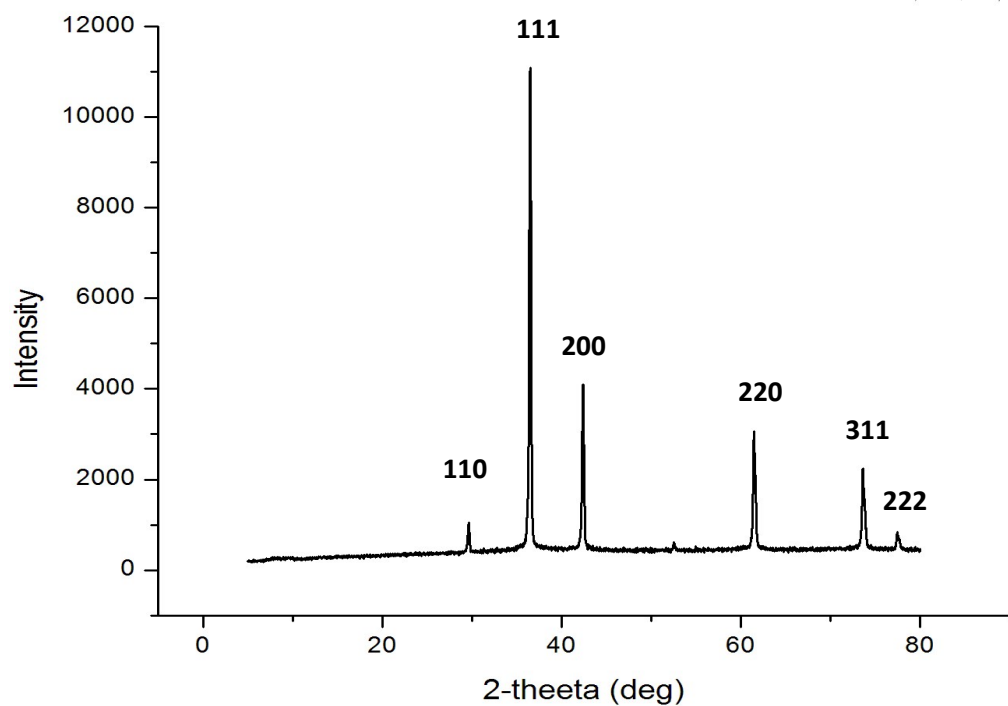

**Fig. S3:** X-Ray Diffraction (XRD) pattern of Cu<sub>2</sub>O NPs.

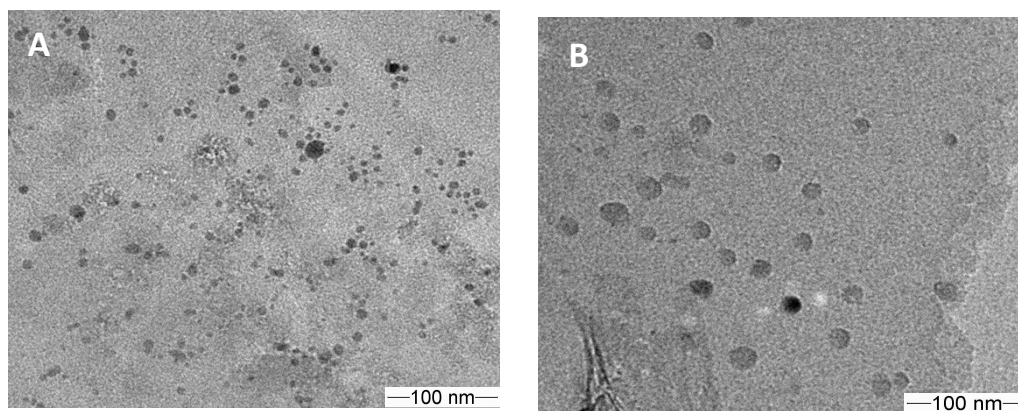

**Fig. S4:** (A) TEM images of spherical supramolecular ensemble 2:Cu<sub>2</sub>O; (A) 2:1 (derivative 1: Benedict's solution); (B) 1:2 (derivative 1 : Benedict's solution)

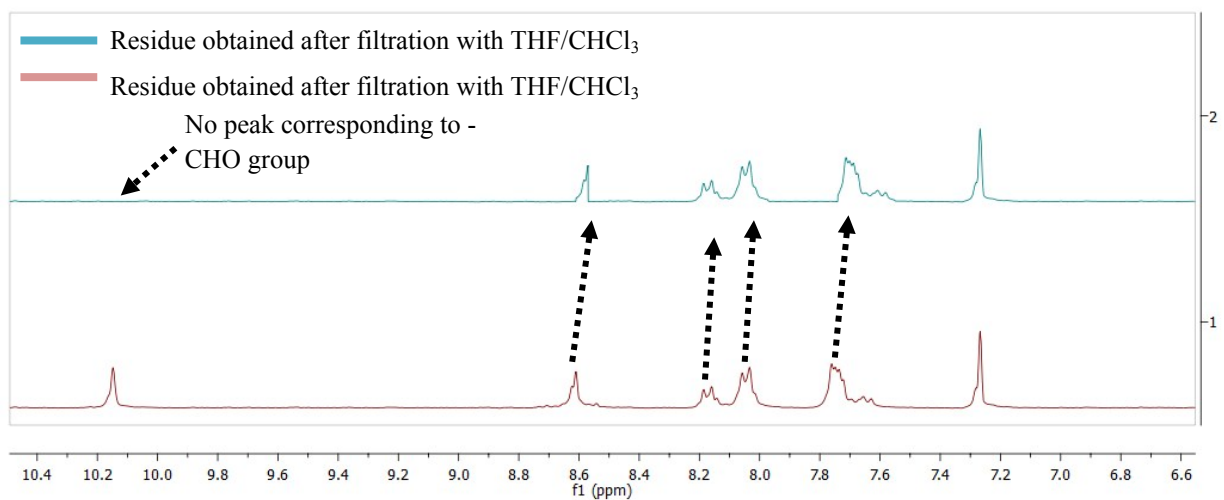

Fig. S5: Overlay NMR spectra of derivative **1** and residue obtained after filtration with THF/CHCl<sub>3</sub> mixture.

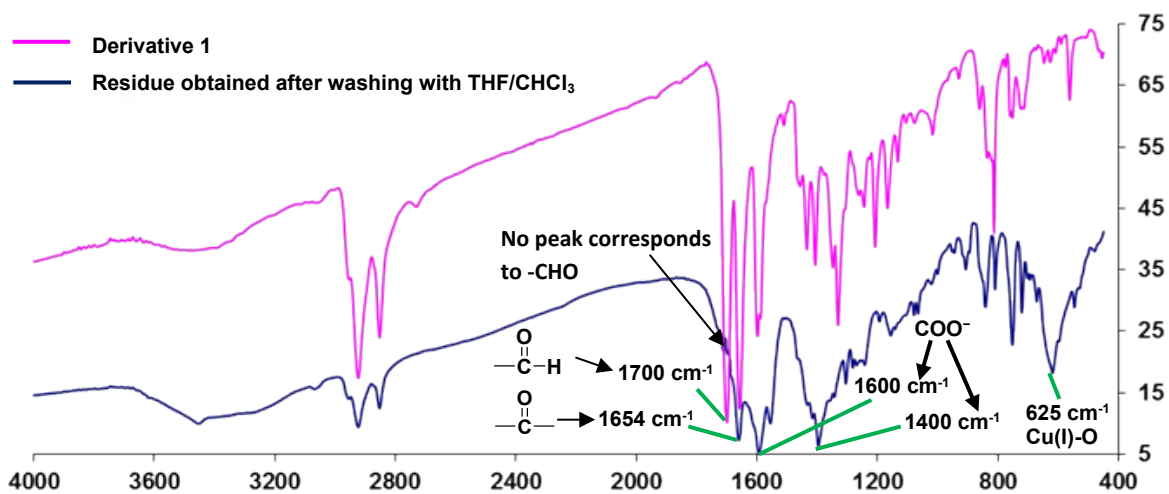

Fig. S6: FT infrared absorption spectra of derivative **1** and residue obtained after filtration with THF/CHCl<sub>3</sub>.



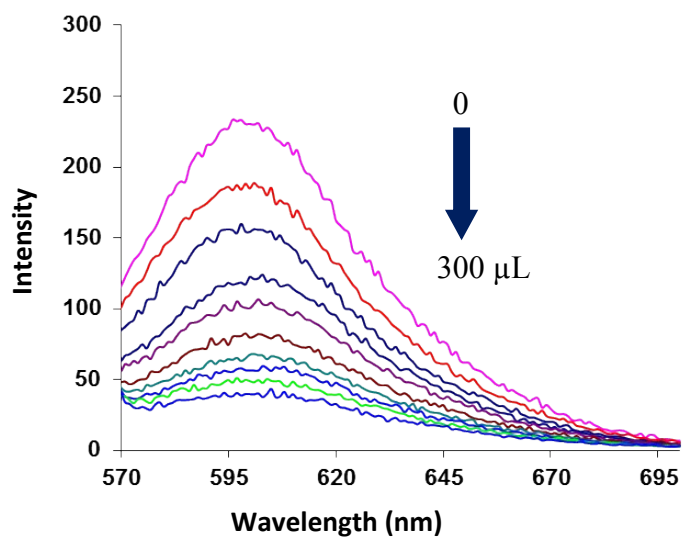

**Fig. S7:** Fluorescence spectra of oxidized species 2 (10 μM) upon addition Cu<sub>2</sub>O NPs (300 μL).

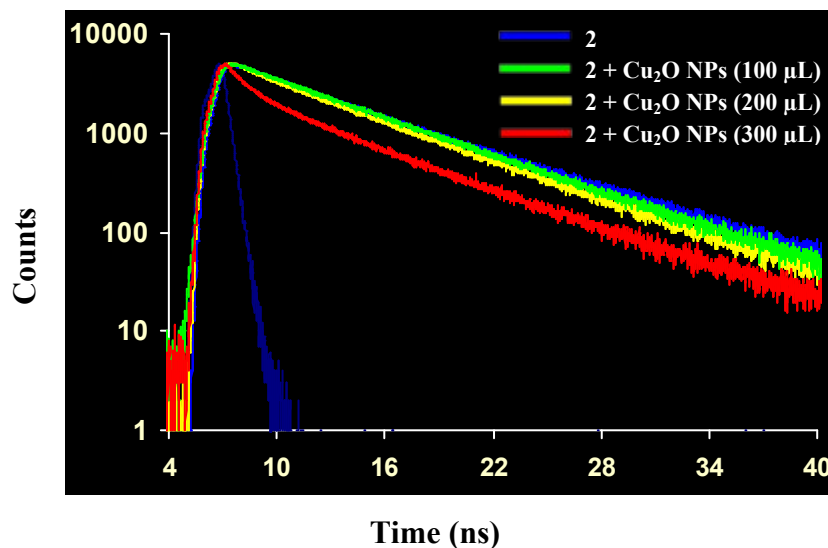

**Fig. S8:** Exponential fluorescence decays of oxidized species of **2** on addition of various amount of bare Cu<sub>2</sub>O NPs measured at 600 nm. Spectra were acquired in Water-THF mixture (1:1),  $\lambda_{\text{ex}} = 540$  nm.

**Table S3:** Fluorescence lifetime of oxidized species of **2** on addition of various amount of bare Cu<sub>2</sub>O NPs measured at 600 nm in Water-THF mixture (1:1).  $A_1$ ,  $A_2$ : fractional amount of molecules in each environment.  $\tau_1$ ,  $\tau_2$  and  $\tau_{\text{avg}}$ : bi-exponential and average life time;  $\lambda_{\text{ex}} = 540$  nm.

| Sample                                                      | $A_1$ | $A_2$ | $\tau_1$<br>(ns) | $\tau_2$<br>(ns) | $\tau_{\text{avg}}$<br>(ns) |
|-------------------------------------------------------------|-------|-------|------------------|------------------|-----------------------------|
| Cpd 3 oxidized                                              | 100   | -     | 7.12             | -                | 7.12                        |
| Cpd 3 Oxidized + Cu <sub>2</sub> O NPs (100 $\mu\text{L}$ ) | 100   | -     | 6.84             | -                | 6.84                        |
| Cpd 3 Oxidized + Cu <sub>2</sub> O (200 $\mu\text{L}$ )     | 100   | -     | 6.47             | -                | 6.47                        |
| Cpd 3 Oxidized + Cu <sub>2</sub> O (300 $\mu\text{L}$ )     | 20.38 | 79.62 | 0.91             | 6.46             | 2.87                        |

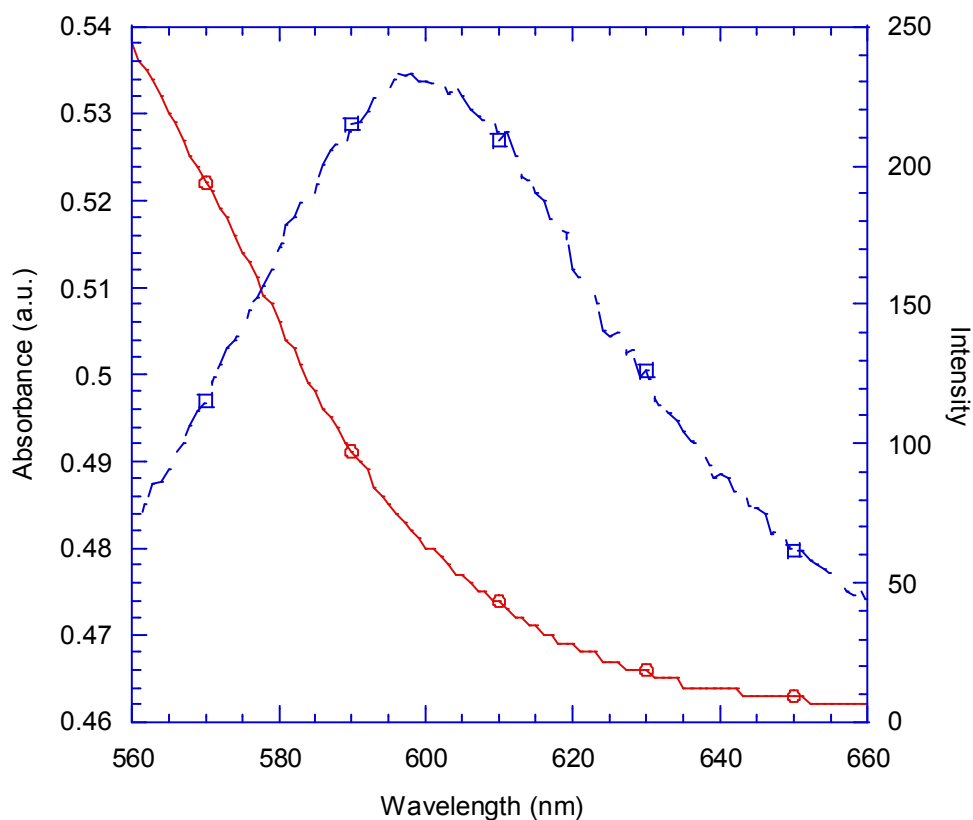

Fig. S9. Spectral overlap of absorption spectrum of Cu<sub>2</sub>O NPs and emission spectrum of oxidized species 2.

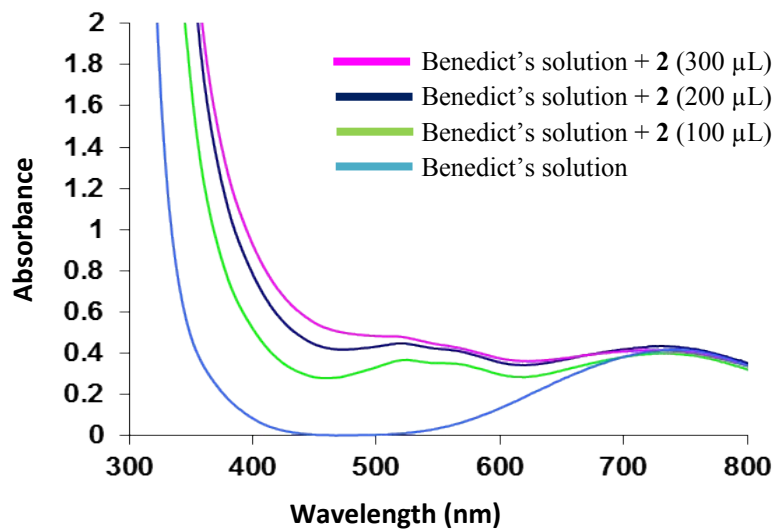

Fig.S10: UV-vis spectra of oxidized species 2 (10 μM) upon addition Benedict's solution (350 μL, 0.04 M).

**Table S4.** Catalytic efficiency of supramolecular ensemble 2:Cu<sub>2</sub>O for photocatalytic Suzuki coupling reaction of bromobenzene with phenyl boronic acid.

| Entry | Catalyst loading | Time (h) | Yield (%) |
|-------|------------------|----------|-----------|
| 1     | 0.02 mmol        | 8        | 75        |
| 2     | 0.01 mmol        | 10       | 72        |
| 3     | 0.005 mmol       | 12       | 68        |

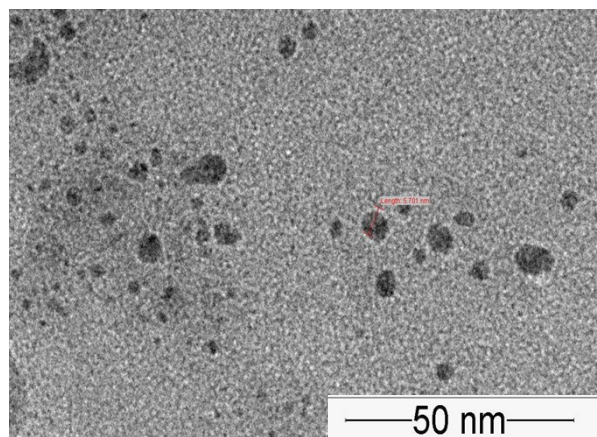

**Fig. S11:** TEM image of spherical supramolecular ensemble 2:Cu<sub>2</sub>O; recovered after photocatalytic Suzuki coupling reaction. Scale bar 50 nm.

## SpectrAA Report.

15:22 05-02-2016

**Analyst**  
**Date Started** 16:06 02-02-2016 GMT: 10:36 02-02-2016  
**Worksheet** Gurpreet020216  
**Comment**  
**Methods** Cu,Cu  
**Computer name** HP-PC  
**Serial Number:**

**Method: Cu (Flame)**

| Sample ID  | Conc mg/L | %RSD   | SD     | Mean Abs |                     |
|------------|-----------|--------|--------|----------|---------------------|
| CAL ZERO   | 0.000     | 23.6   | 0.0000 | 0.0002   |                     |
|            | Readings  |        |        |          |                     |
|            | 0.0002    | 0.0002 | 0.0001 |          | 02-02-2016 16:16:06 |
|            | ISF       |        |        |          |                     |
|            | 1.0000    |        |        |          |                     |
| STANDARD 1 | 1.000     | 1.4    | 0.0009 | 0.0605   |                     |
|            | Readings  |        |        |          |                     |
|            | 0.0595    | 0.0610 | 0.0610 |          | 02-02-2016 16:16:38 |
|            | ISF       |        |        |          |                     |
|            | 1.0000    |        |        |          |                     |
| STANDARD 2 | 3.000     | 1.1    | 0.0022 | 0.1978   |                     |
|            | Readings  |        |        |          |                     |
|            | 0.2002    | 0.1975 | 0.1957 |          | 02-02-2016 16:17:08 |
|            | ISF       |        |        |          |                     |
|            | 1.0000    |        |        |          |                     |
| STANDARD 3 | 5.000     | 0.7    | 0.0024 | 0.3283   |                     |
|            | Readings  |        |        |          |                     |
|            | 0.3260    | 0.3307 | 0.3282 |          | 02-02-2016 16:17:38 |
|            | ISF       |        |        |          |                     |
|            | 1.0000    |        |        |          |                     |
| Sample 001 | 0.012     | 10.9   | 0.0001 | 0.0007   |                     |
|            | Readings  |        |        |          |                     |
|            | 0.0007    | 0.0006 | 0.0008 |          | 02-02-2016 16:20:04 |
|            | ISF       |        |        |          |                     |
|            | 1.0000    |        |        |          |                     |

**Fig. S12:** Atomic absorption Studies (AAS) of the residual liquid left after the after the recycling of the catalyst and found that only 0.012 mg/lit = 0.012 ppm of copper leached into the solution.

**<sup>1</sup>H NMR spectra of products of the photocatalytic Suzuki coupling reactions using different substrates.**

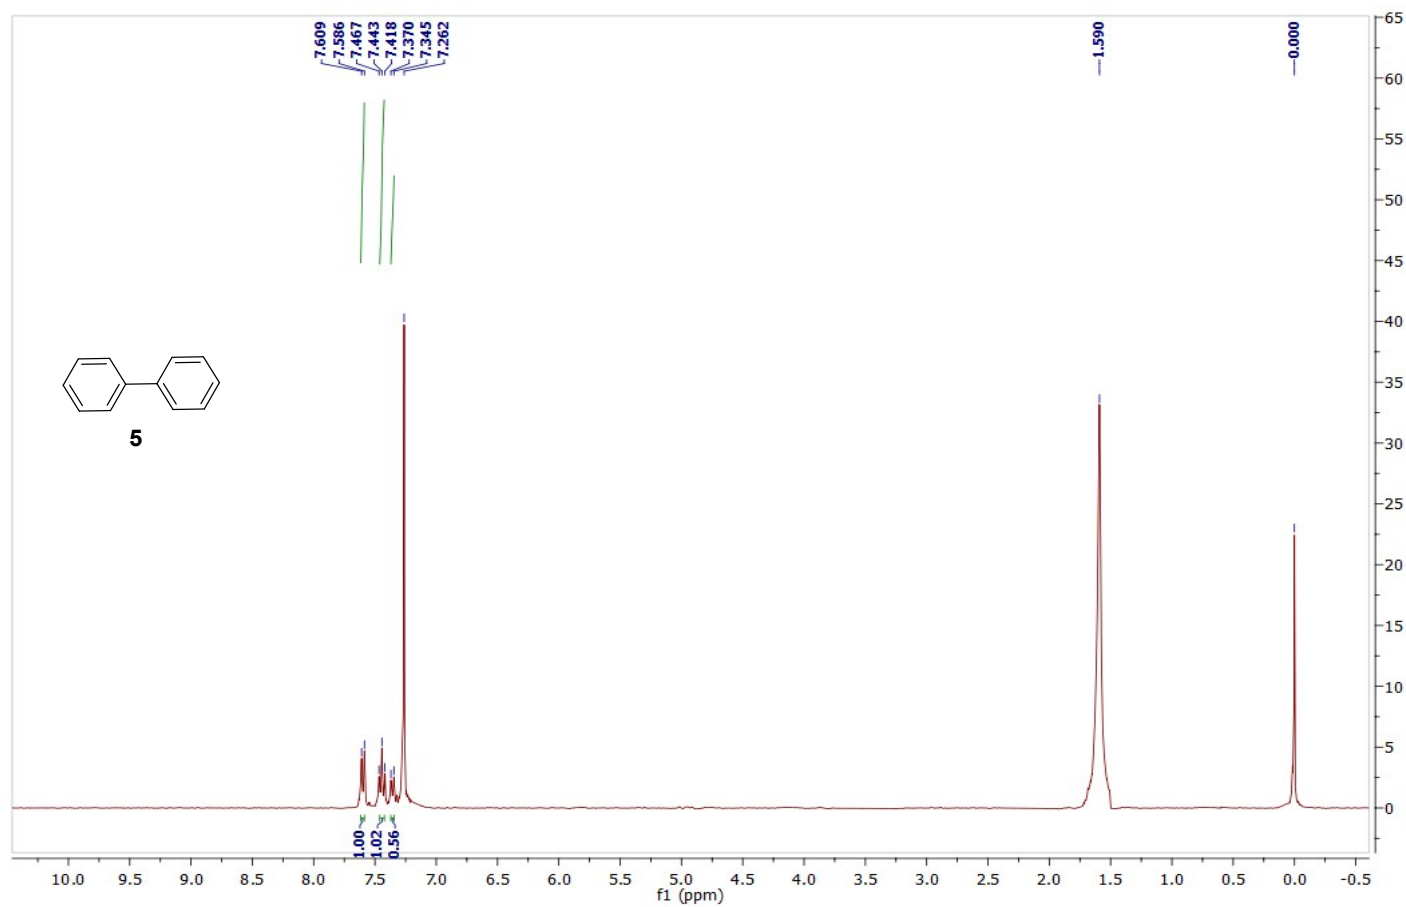

**Fig. S13:** The <sup>1</sup>H NMR spectrum of compound 5 in CDCl<sub>3</sub>.

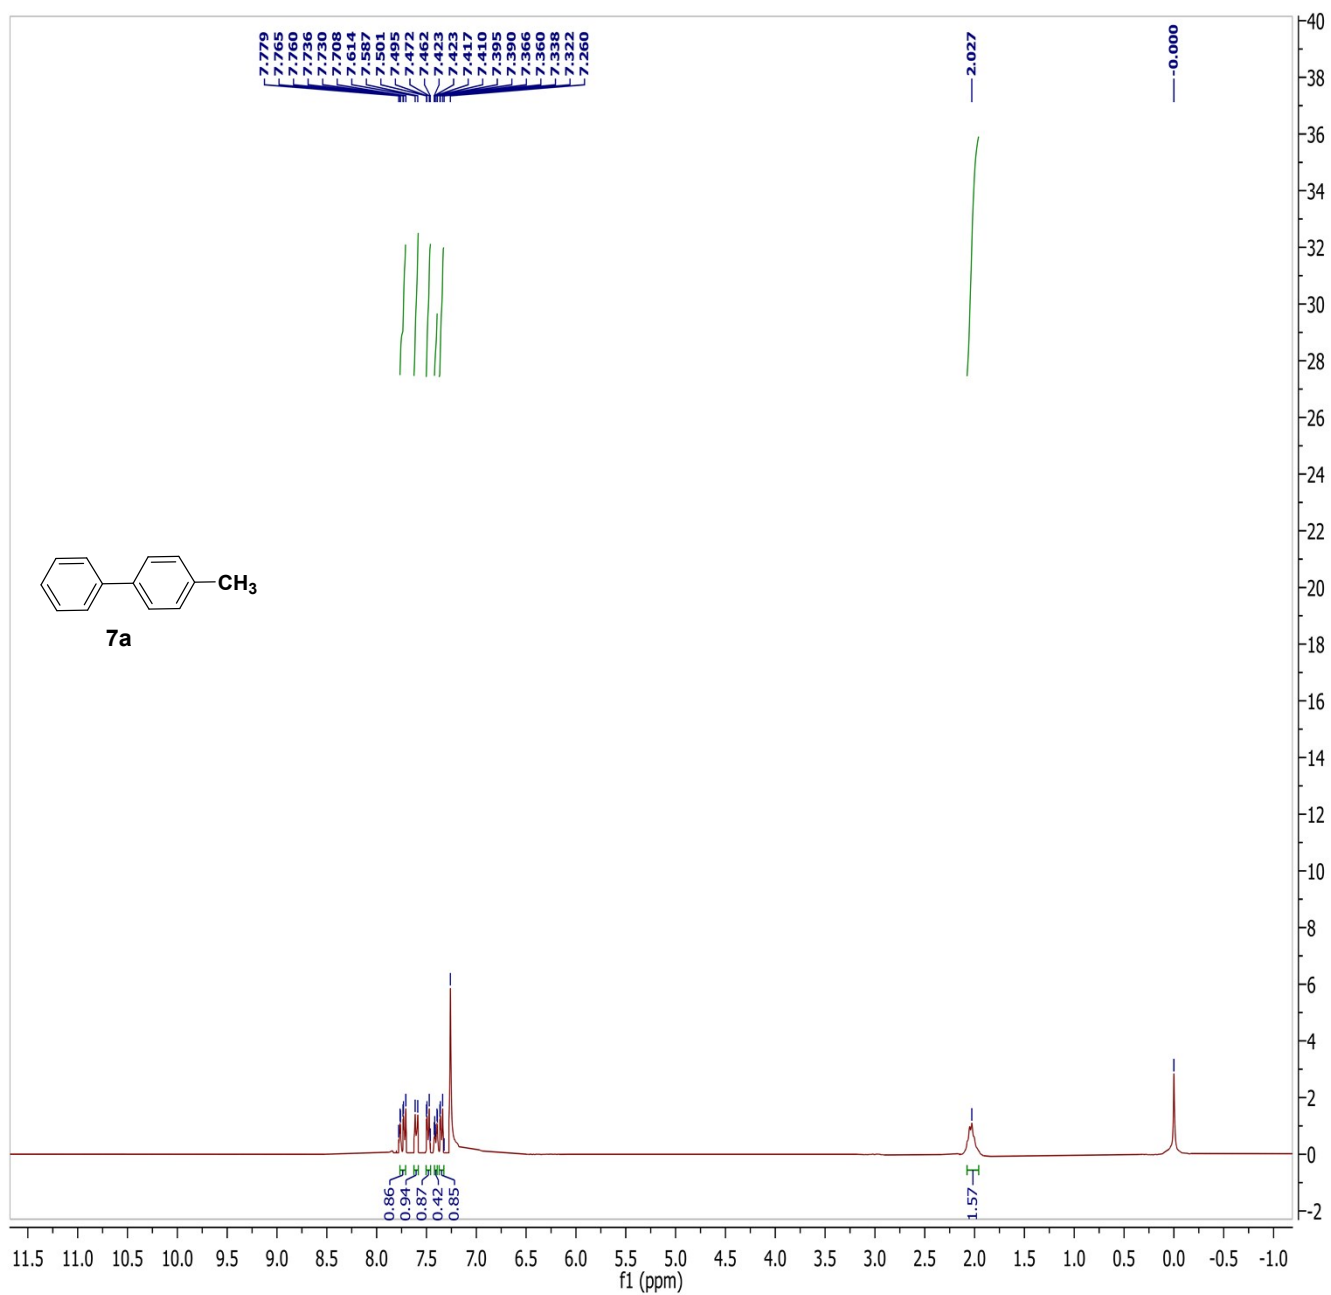

**Fig. S14:** The  $^1\text{H}$  NMR spectrum compound 7a in  $\text{CDCl}_3$ .

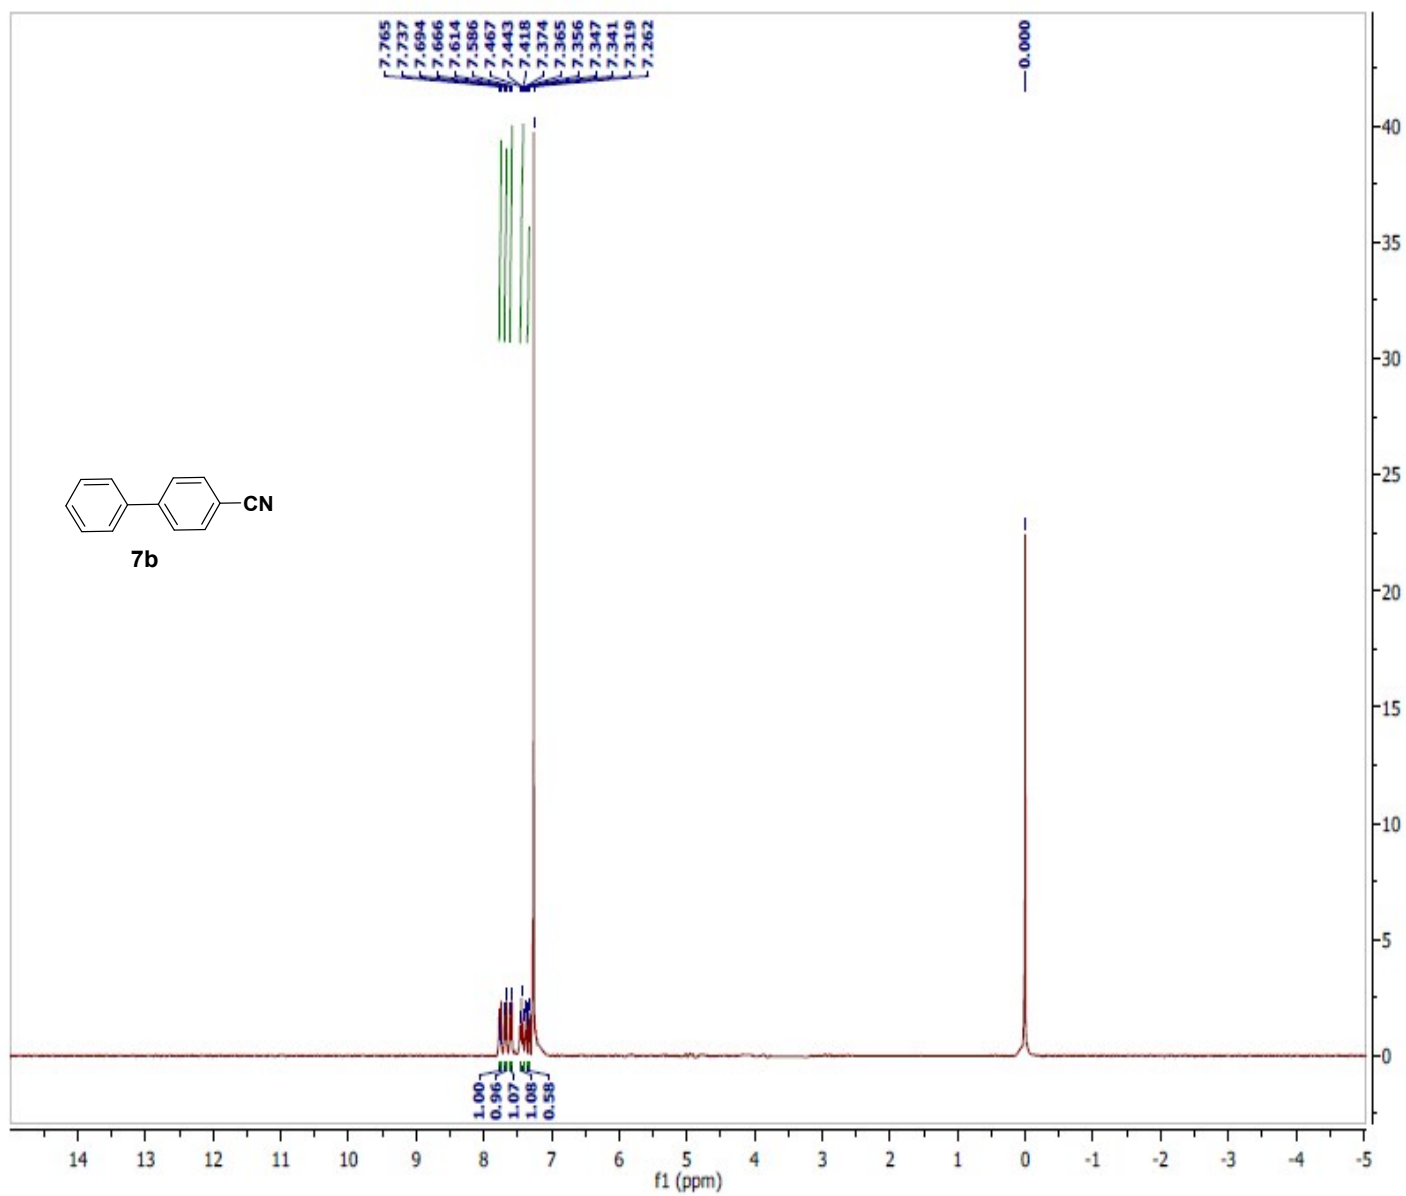

**Fig.S15:** The  $^1\text{H}$  NMR spectrum compound 7b in  $\text{CDCl}_3$ .



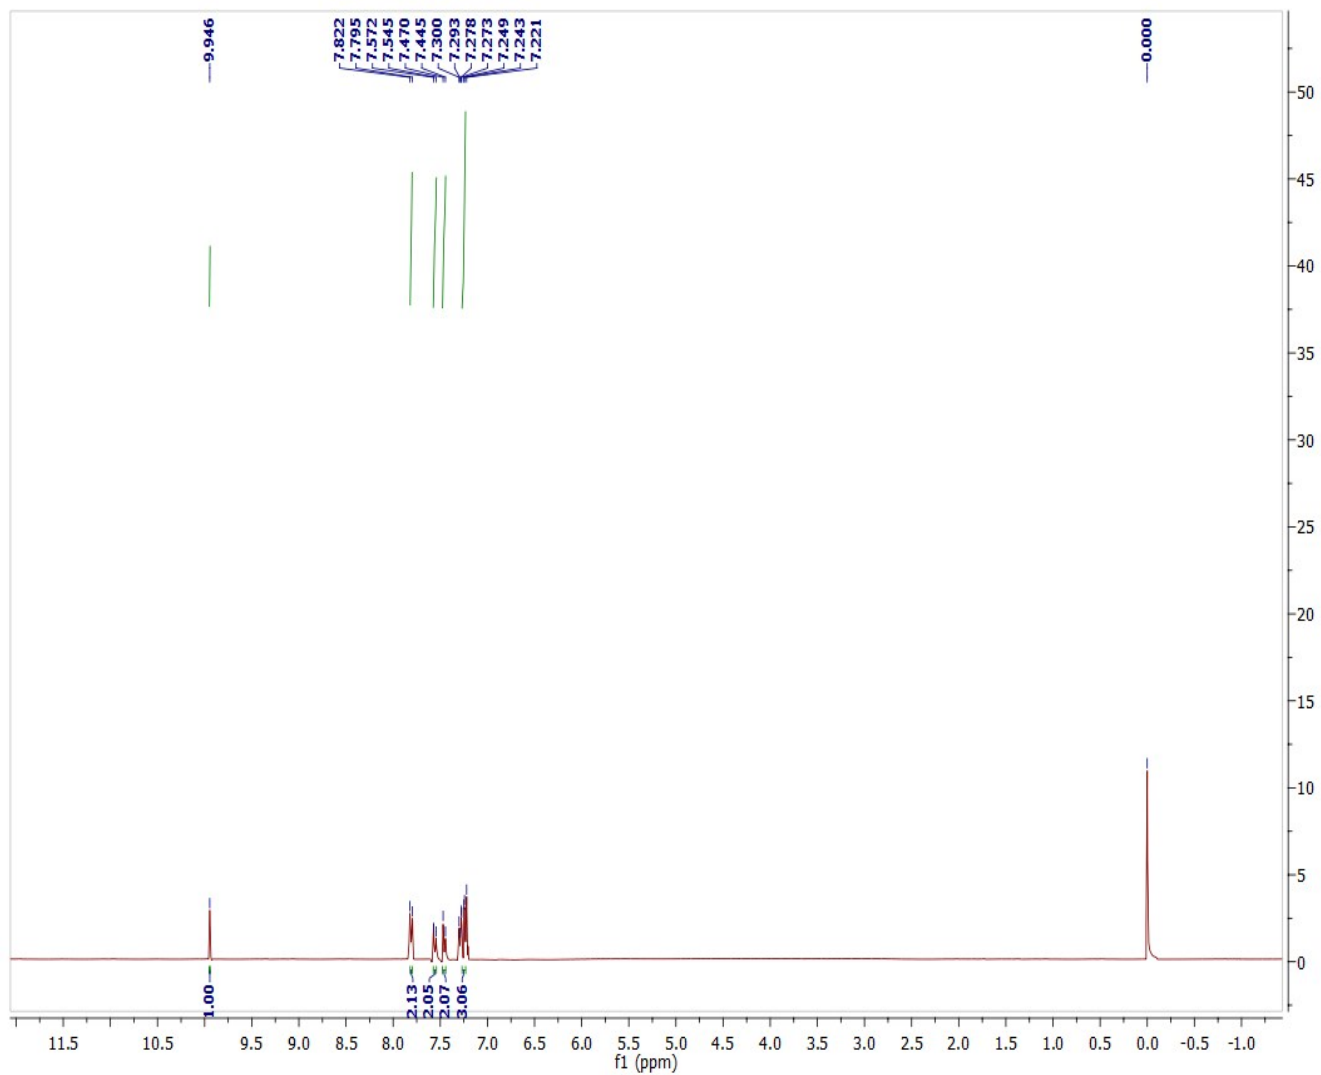

**Fig.S16:** The  $^1\text{H}$  NMR spectrum of compound 7c in  $\text{CDCl}_3$ .

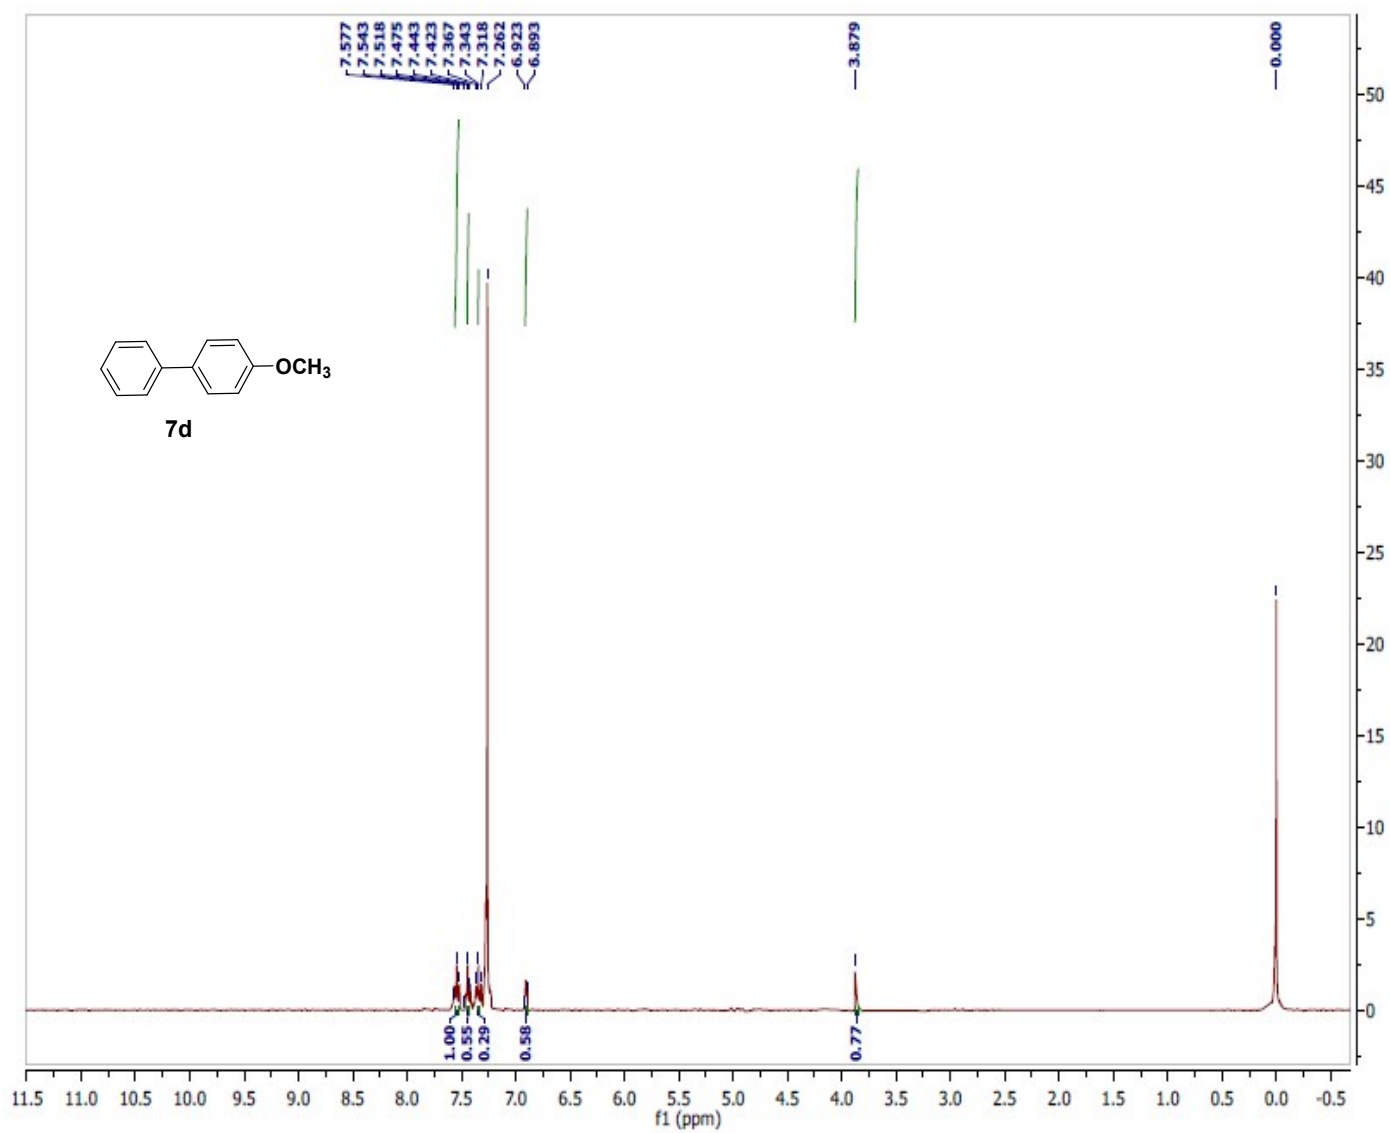

**Fig.17** The <sup>1</sup>H NMR spectrum of compound **7d** in CDCl<sub>3</sub>.

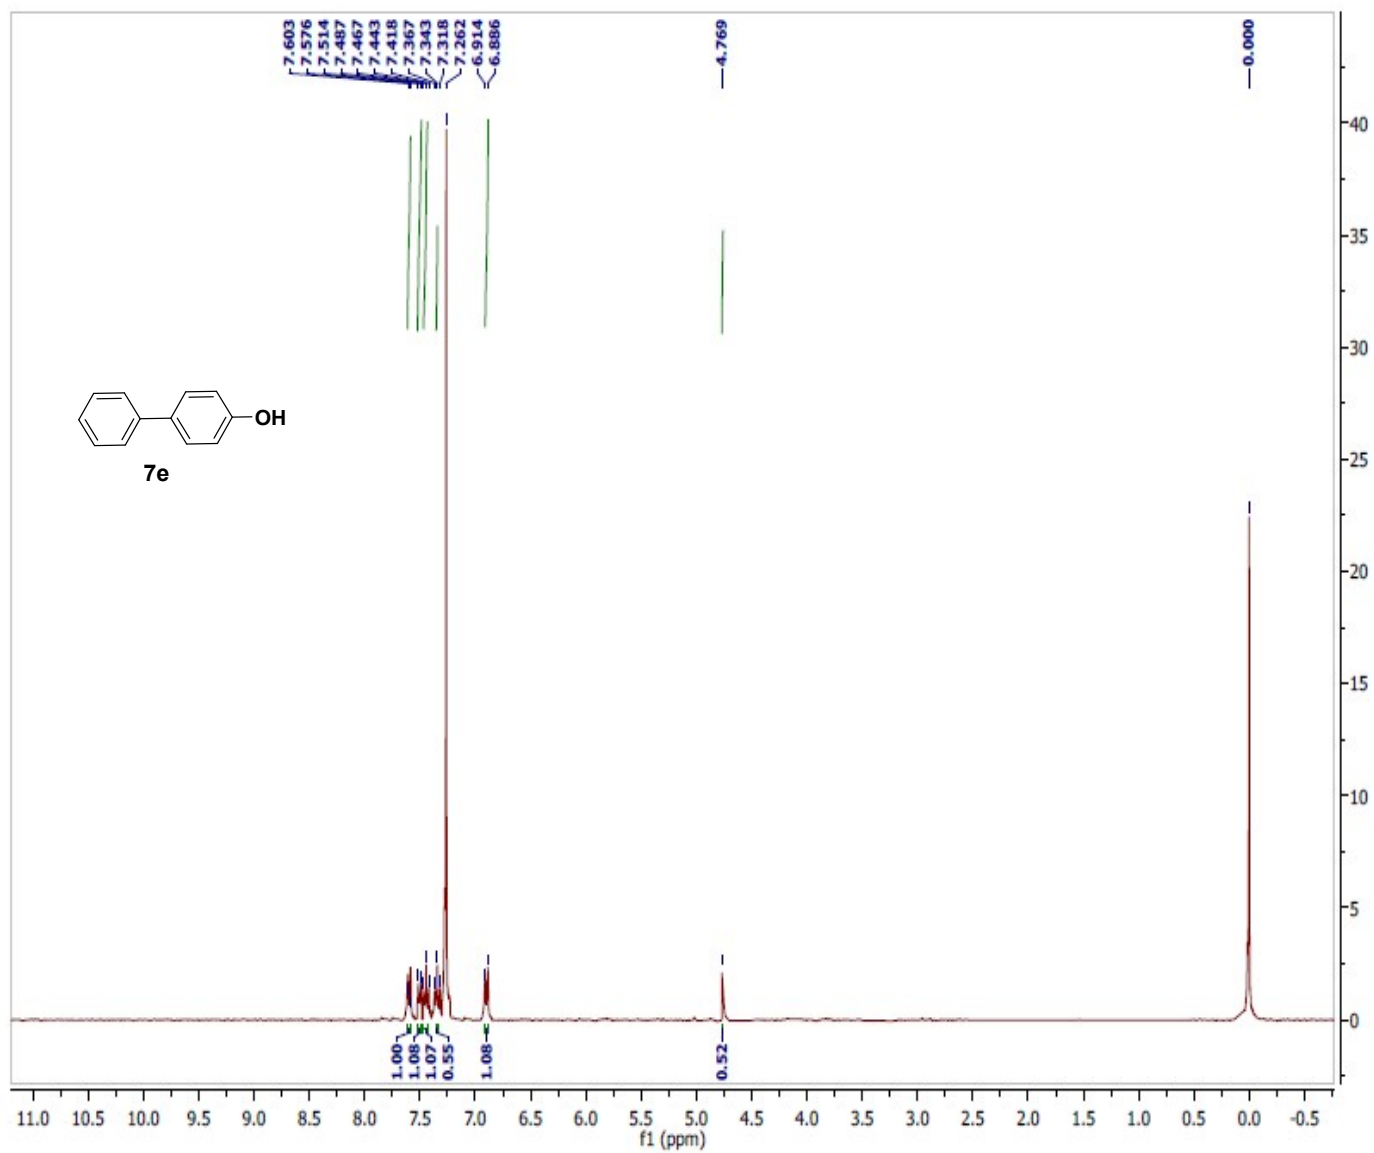

**Fig.S18:** The <sup>1</sup>H NMR spectrum of compound **7a** in CDCl<sub>3</sub>.

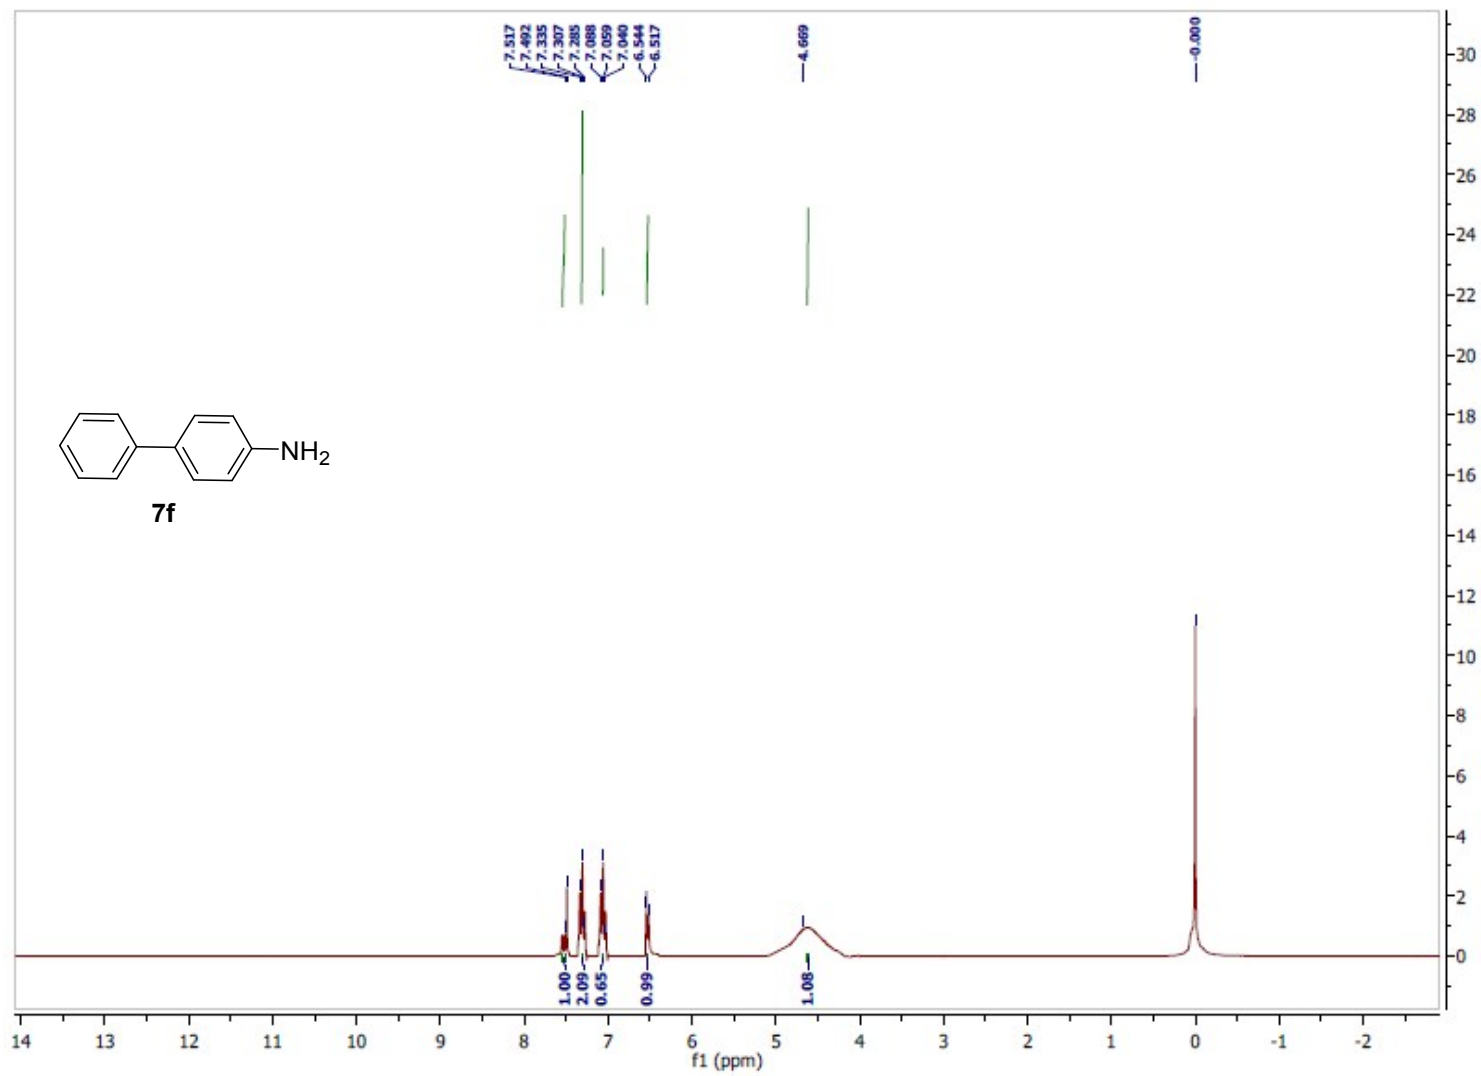

**Fig.S19:** The <sup>1</sup>H NMR spectrum of compound **7f** in CDCl<sub>3</sub>.

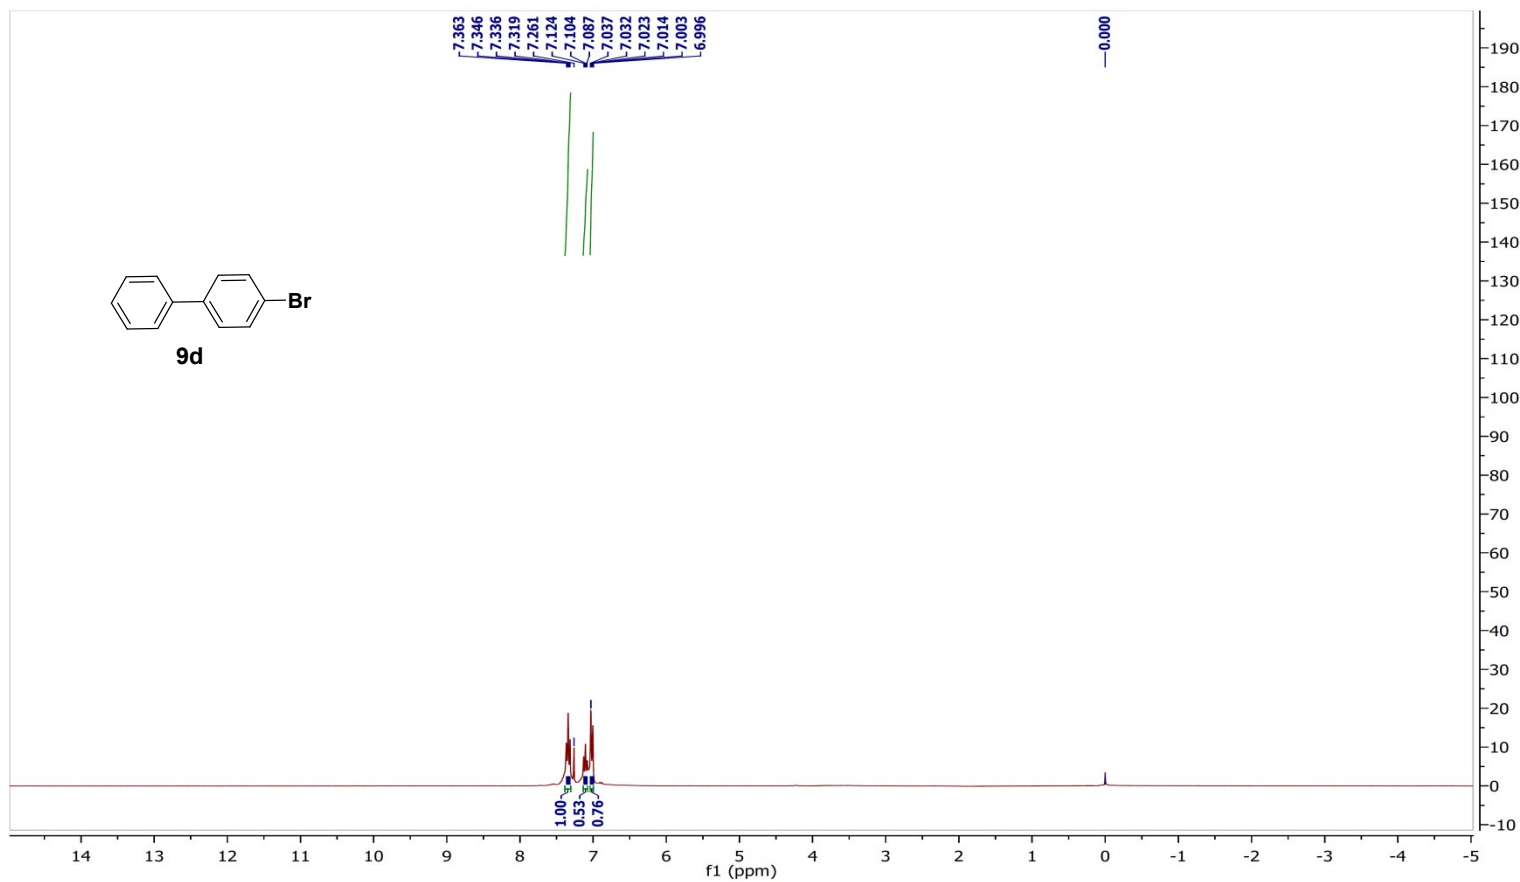

**Fig.S20:** The  $^1\text{H}$  NMR spectrum of compound **9d** in  $\text{CDCl}_3$ .

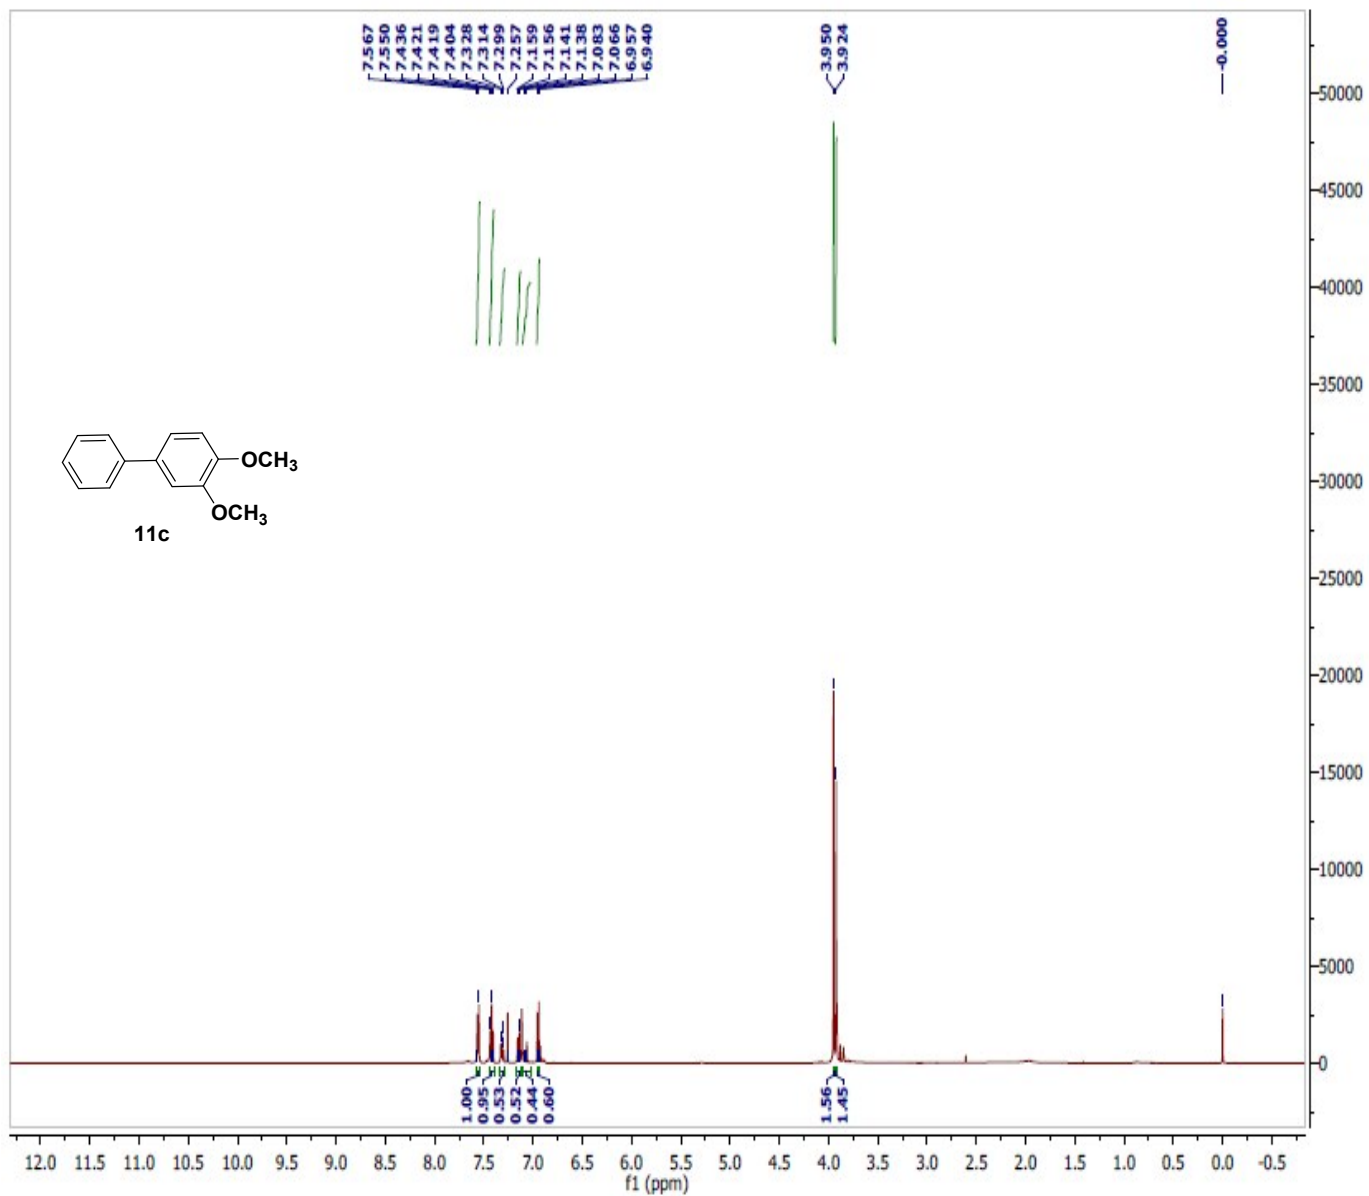

**Fig.S21:** The  $^1\text{H}$  NMR spectrum of compound **11c** in  $\text{CDCl}_3$ .

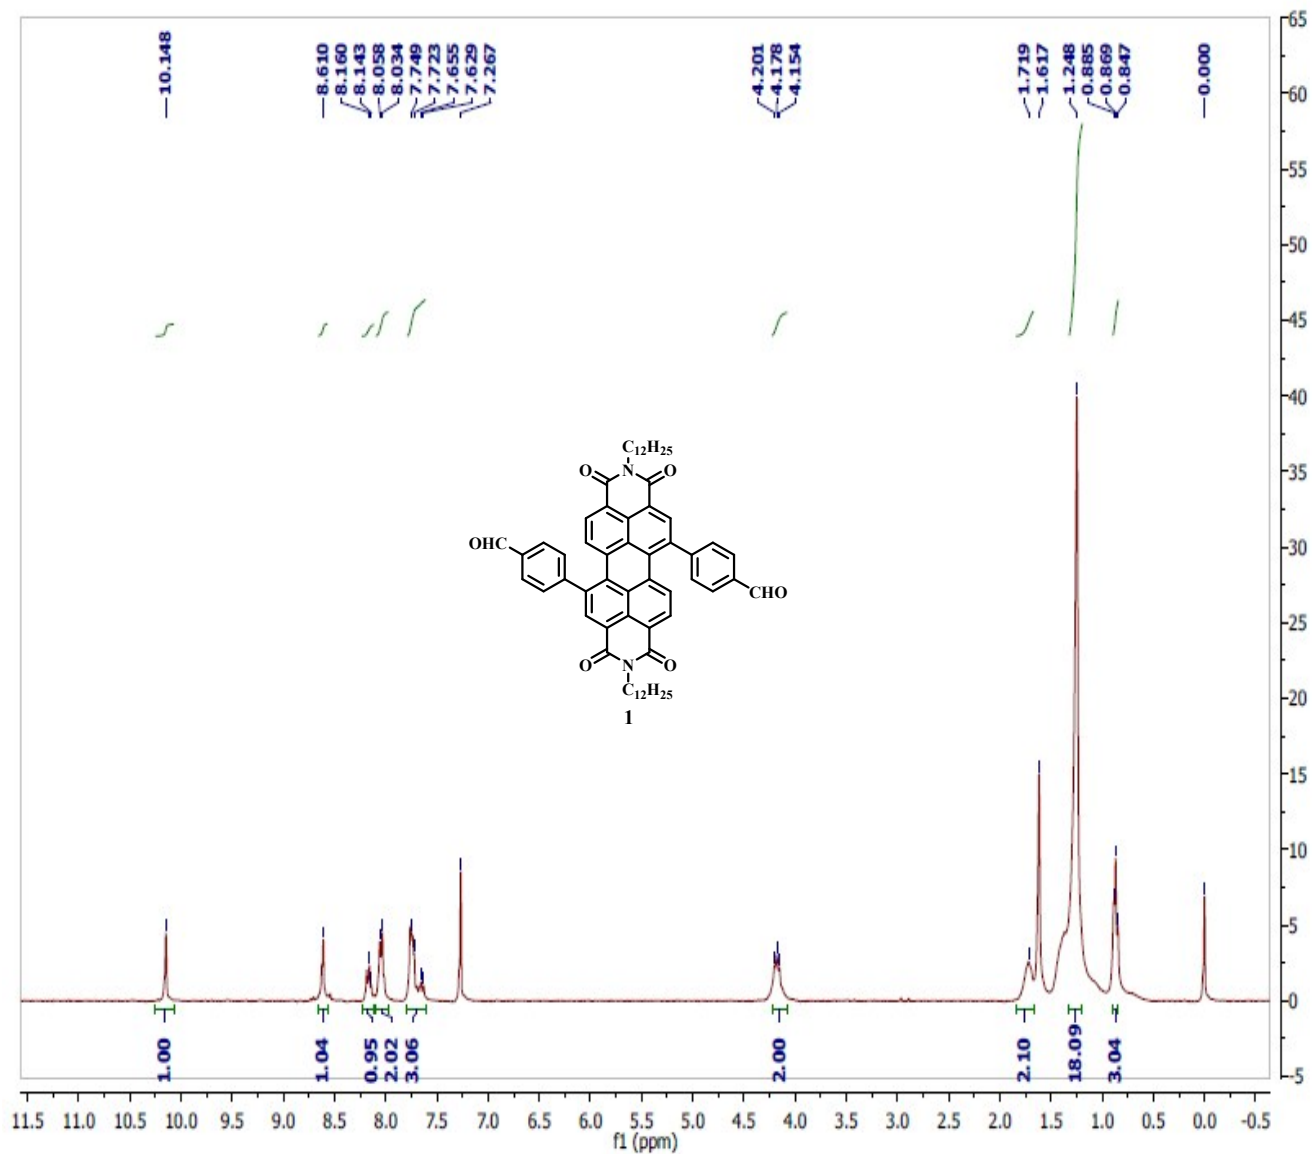

Fig.S22: The <sup>1</sup>H NMR spectrum of compound **1** in CDCl<sub>3</sub>.

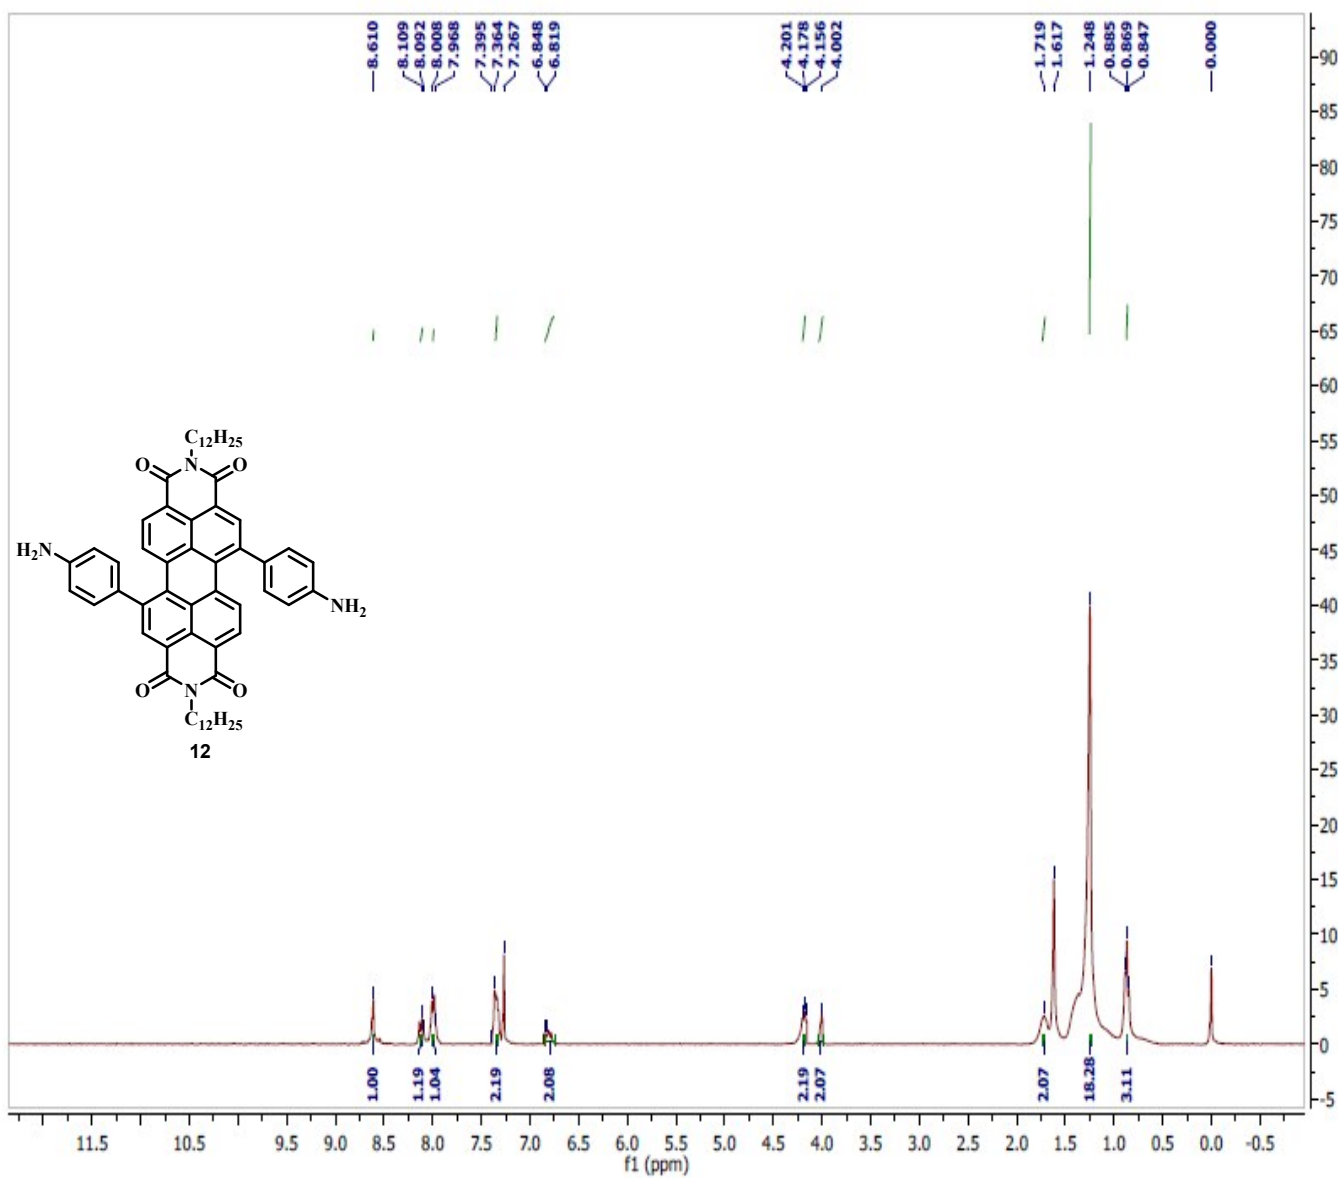

**Fig.S23:** The <sup>1</sup>H NMR spectrum compound **12** in CDCl<sub>3</sub>.



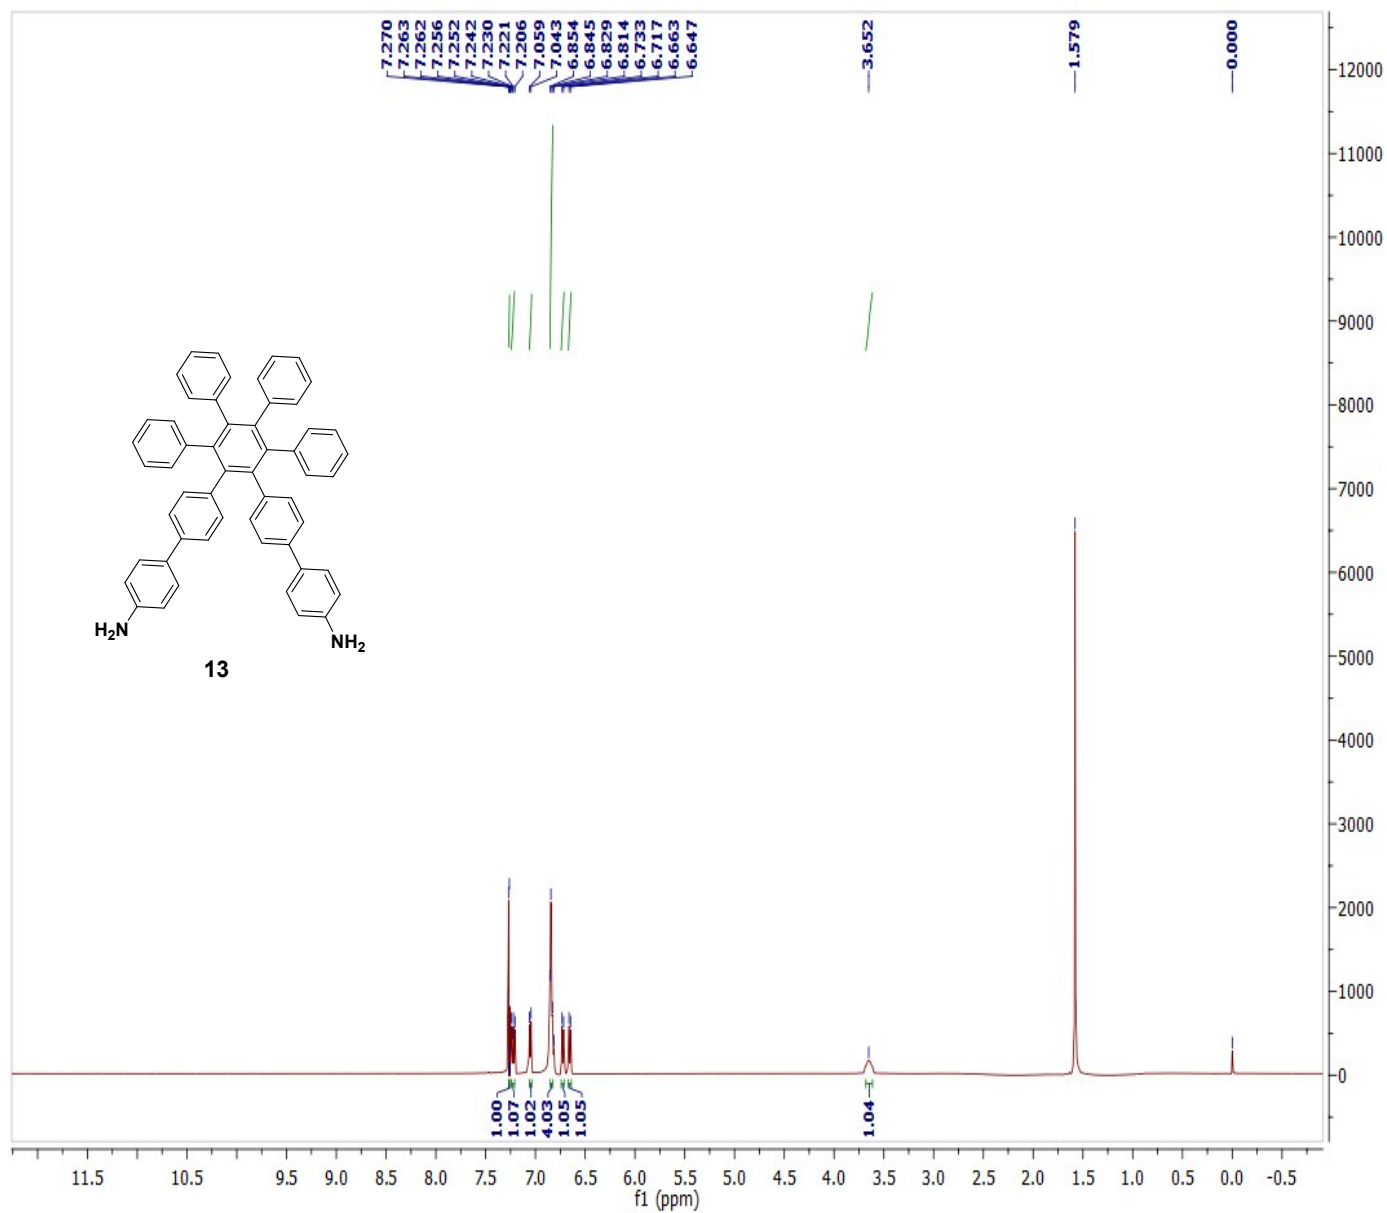

**Fig.S24:** The  $^1\text{H}$  NMR spectrum of compound **13** in  $\text{CDCl}_3$ .

**<sup>1</sup>H NMR spectra of products of the photocatalytic Suzuki type coupling reactions using different substrates.**

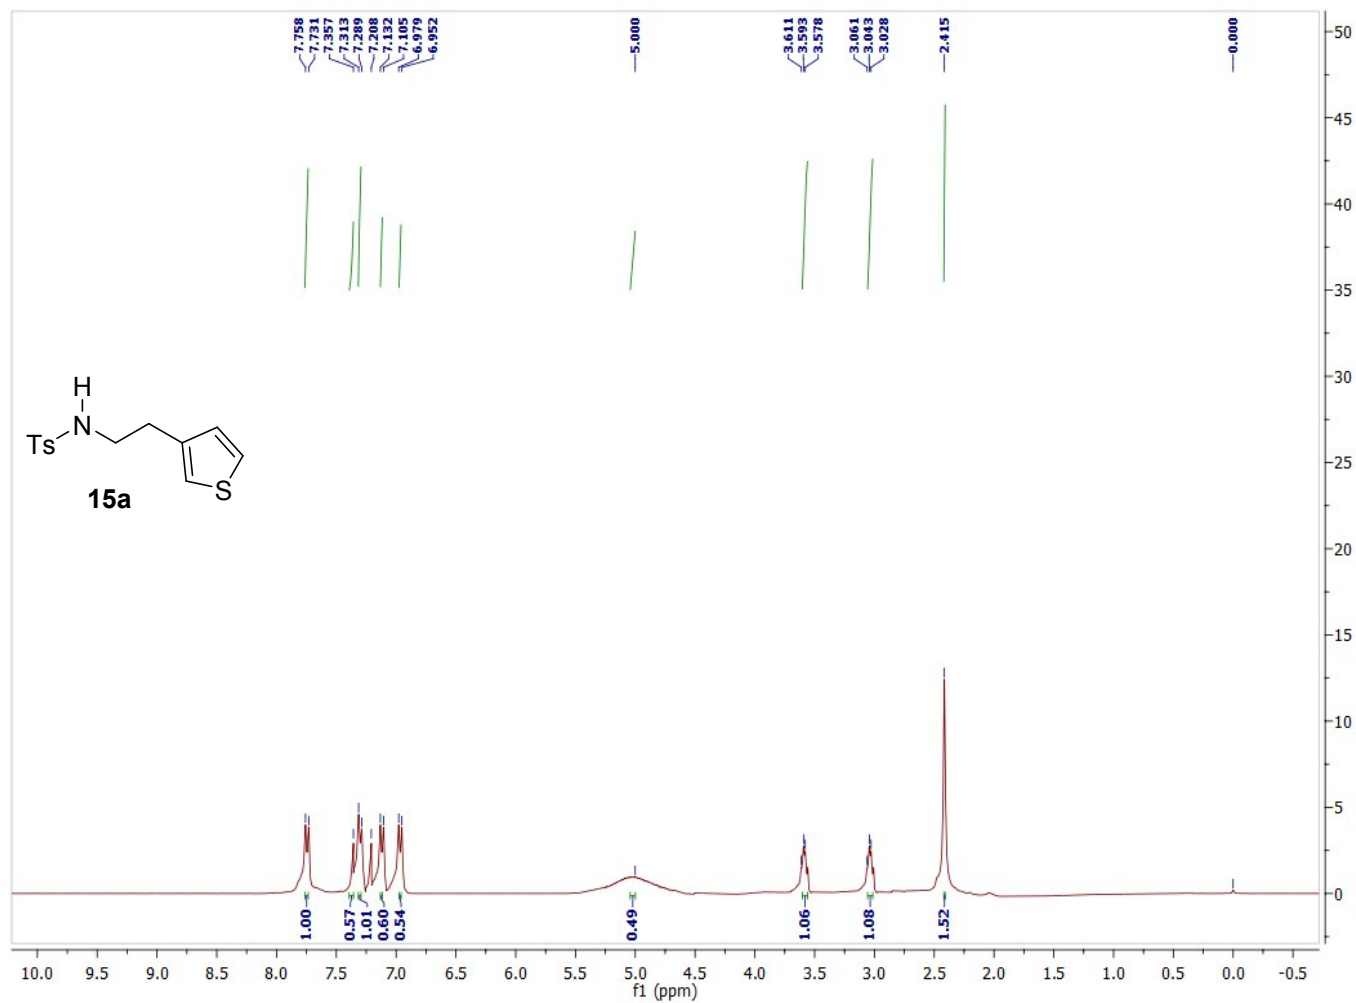

**Fig.S25:** The <sup>1</sup>H NMR spectrum of compound **15a** in CDCl<sub>3</sub>.

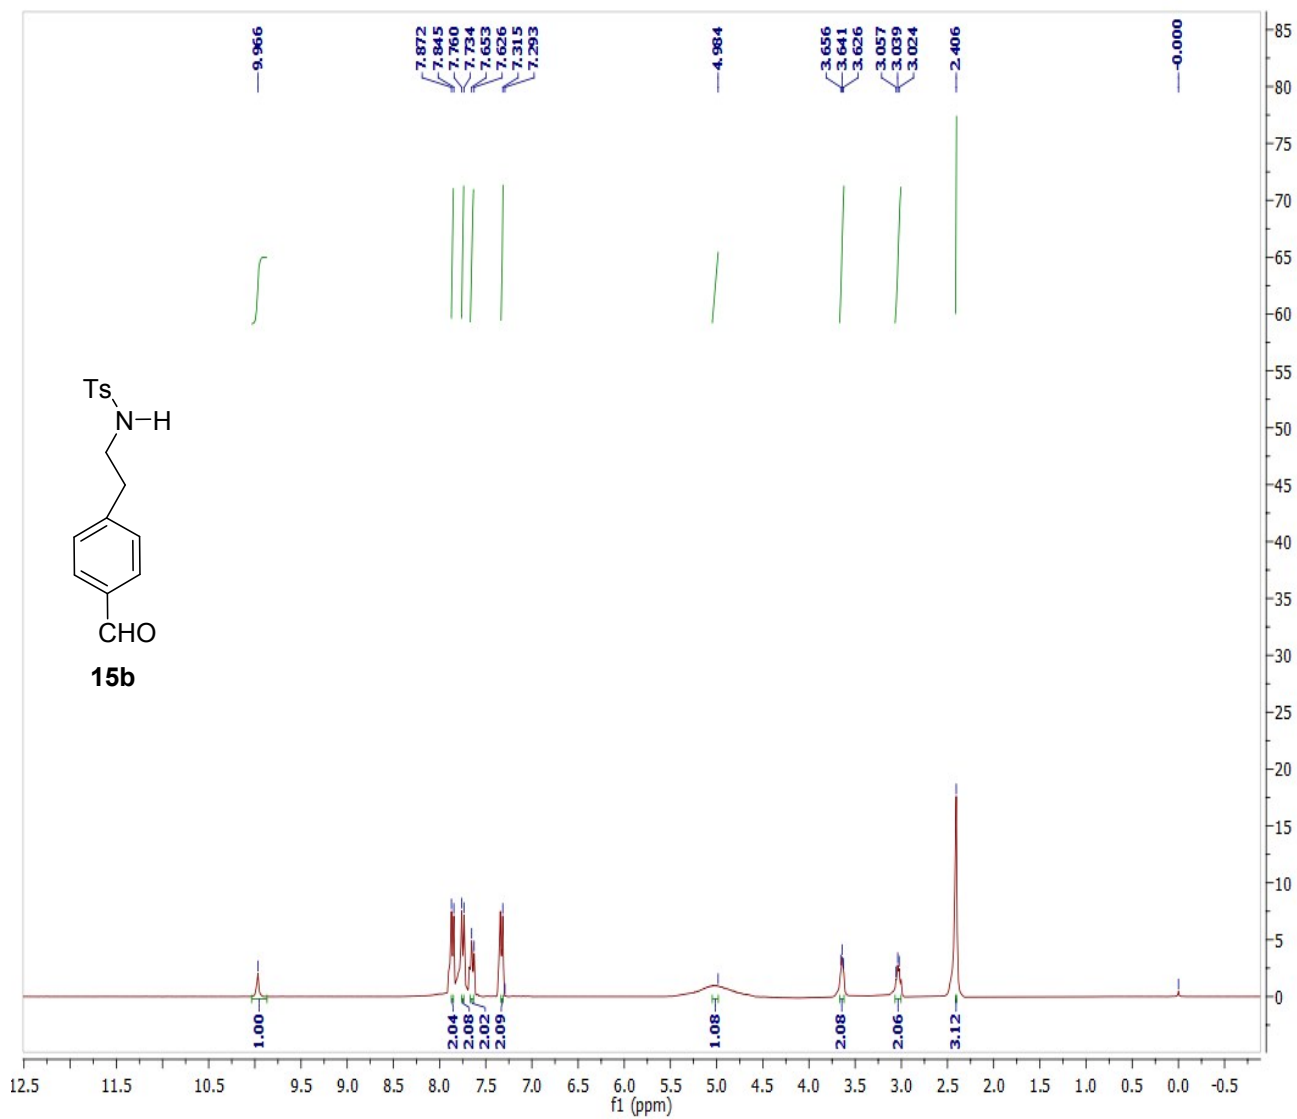

**Fig. S26:** The <sup>1</sup>H NMR spectrum of compound **15b** in CDCl<sub>3</sub>.

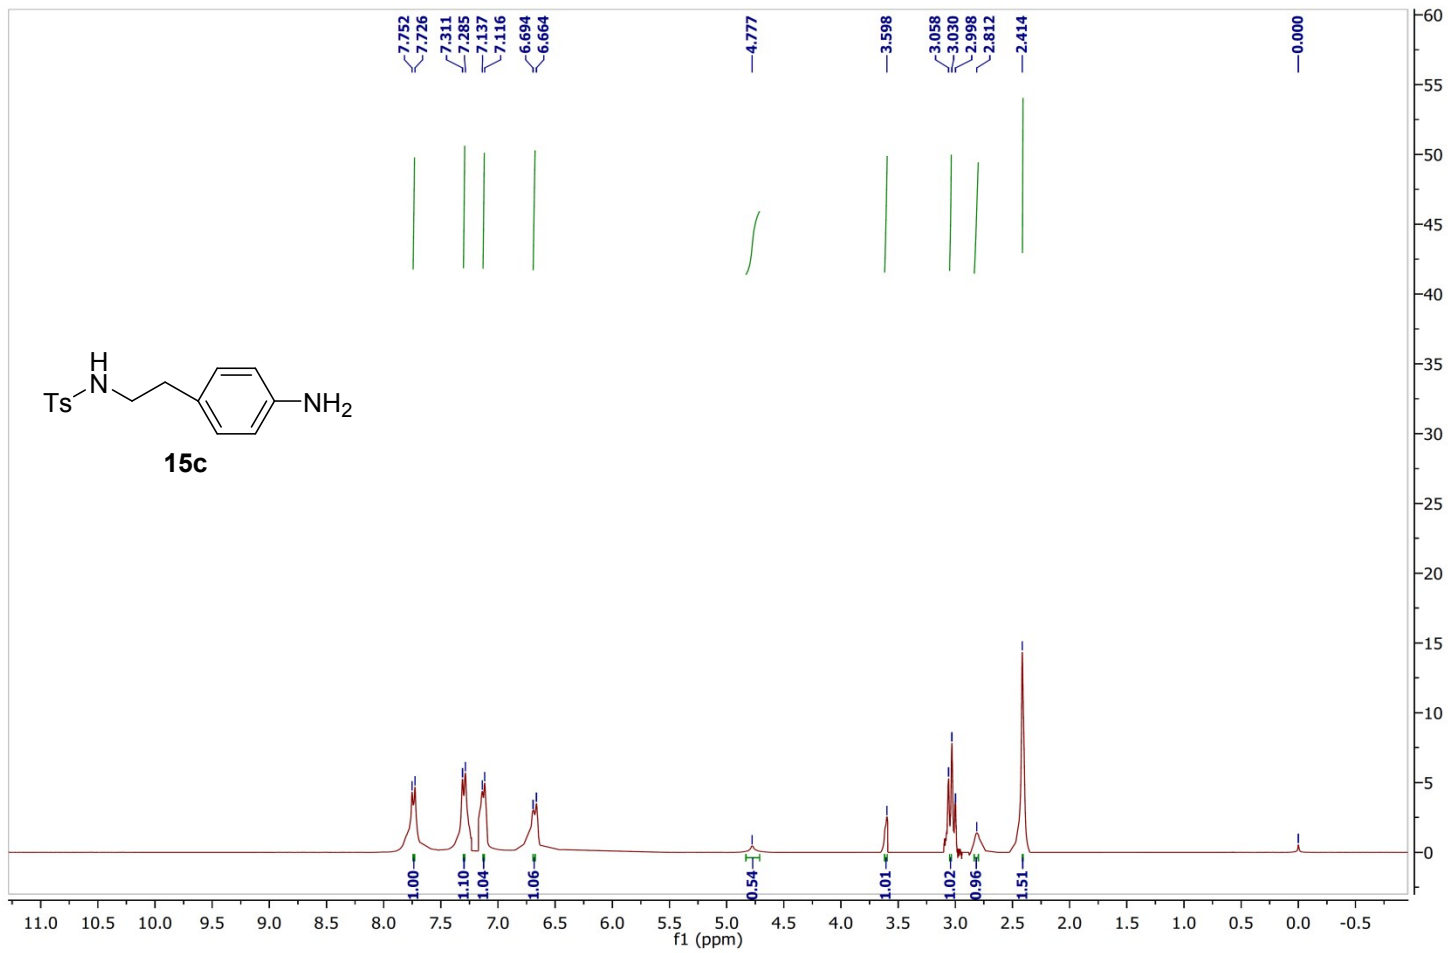

**Fig.S27:** The  $^1\text{H}$  NMR spectrum of compound 15c in  $\text{CDCl}_3$ .

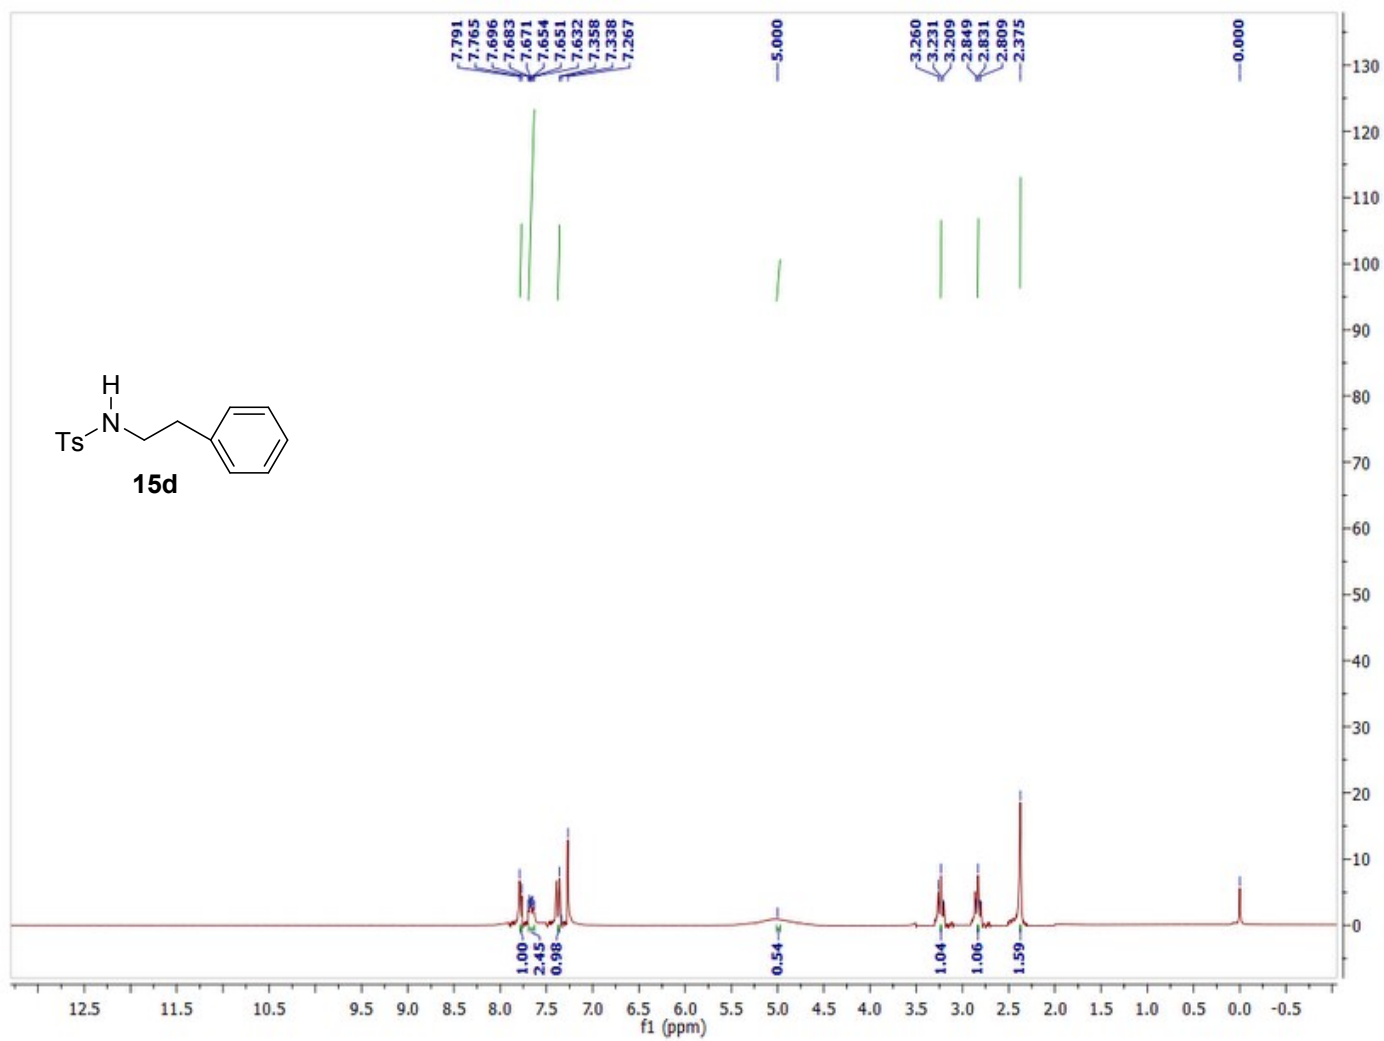

**Fig.S28:** The  $^1\text{H}$  NMR spectrum of compound **15d** in  $\text{CDCl}_3$ .

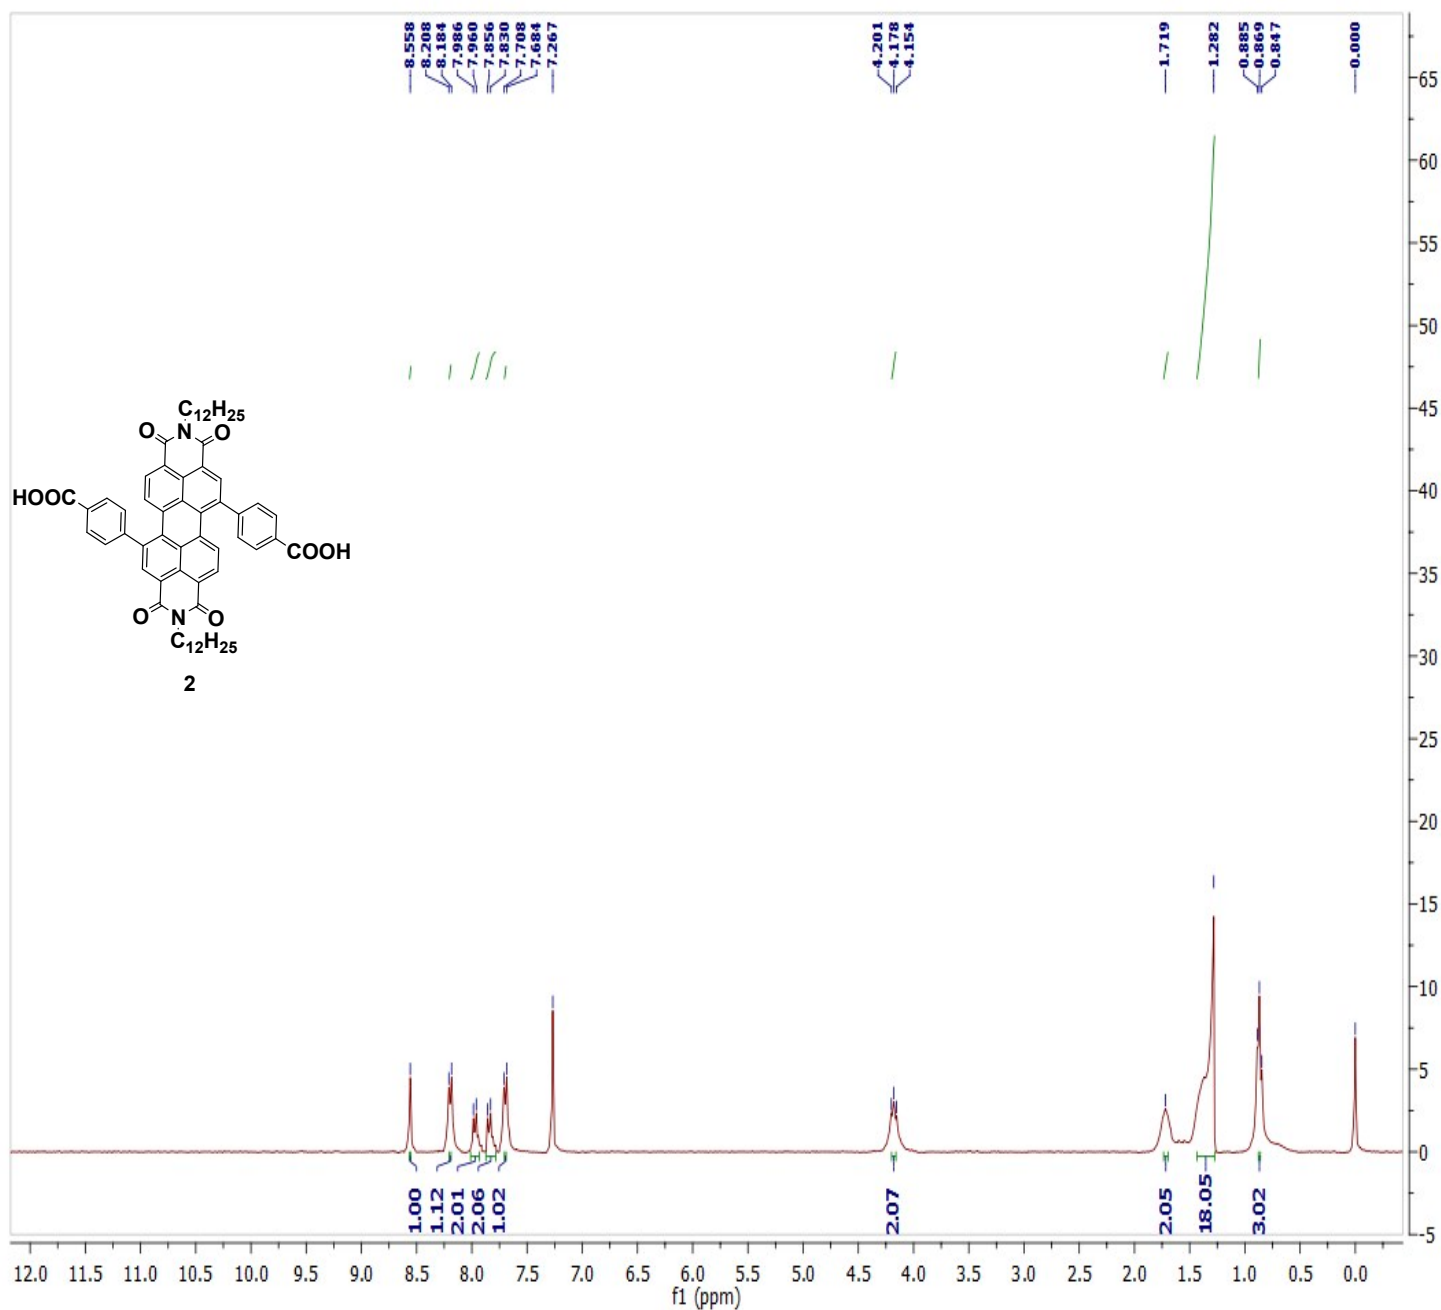

**Fig.S29:** The <sup>1</sup>H NMR spectrum of compound **2** in CDCl<sub>3</sub>.

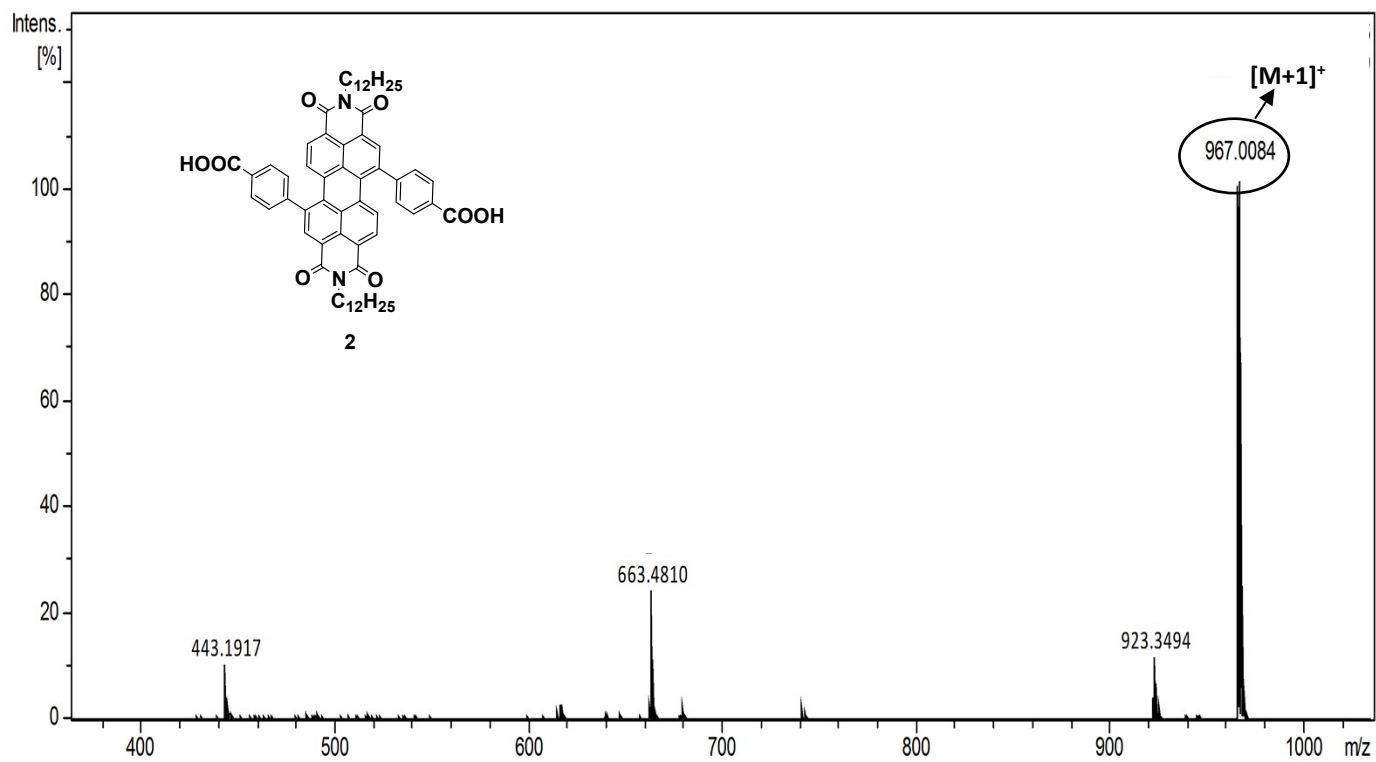

**Fig.S30:** The mass spectrum of compound **2** in  $CDCl_3$ .
